# Supplementary material
Source: PubMed Central journal article supplement (PMC4883668)
Supplement: NIHMS788212-supplement-1.pdf [file NIHMS788212-supplement-1.pdf]

Methicillin-resistant *Staphylococcus aureus* (MRSA)-active Metabolites from *Platanus occidentalis* (American Sycamore)

Supporting Information

Mohamed A. Ibrahim,<sup>1</sup> Arsala A. Mansoor,<sup>1</sup> Amanda Gross,<sup>1</sup> M. Khalid Ashfaq,<sup>2</sup> Melissa Jacob,<sup>2</sup> Shabana I. Khan,<sup>2</sup> and Mark T. Hamann<sup>1,2,3,4,\*</sup>

<sup>1</sup>*Department of Pharmacognosy, School of Pharmacy, The University of Mississippi, University, MS 38677*

<sup>2</sup>*National Center for Natural Products Research, School of Pharmacy, The University of Mississippi, University, MS 38677*

<sup>3</sup>*Pharmacology, Chemistry & Biochemistry School of Pharmacy, The University of Mississippi, University, MS 38677*

<sup>4</sup>*Triton Biopharma AG, 111 Grangeway Avenue, Suite 404, Toronto, ON M1H 3E9 CA*

-----  
Key words: Selective anti MRSA, *Platanus occidentalis*, American Sycamore.

\* Corresponding author: Tel.:+1 6629155730; Fax:+1 6629156975; E-mail: mthamann@olemiss.edu

## TABLE OF CONTENTS

|                                           |    |
|-------------------------------------------|----|
| LC/MS of the crude glycosides mixture     | 3  |
| <sup>1</sup> H NMR of the four glycosides | 4  |
| In vivo activity, in vitro cytotoxicity   | 5  |
| <sup>1</sup> H NMR of glycoside (1)       | 6  |
| <sup>13</sup> C NMR of glycoside (1)      | 7  |
| HSQC of glycoside (1)                     | 8  |
| COSY of glycoside (1)                     | 9  |
| HMBC of glycoside (1)                     | 10 |
| <sup>1</sup> H NMR of glycoside (2)       | 11 |
| <sup>13</sup> C NMR of glycoside (2)      | 12 |
| HMBC of glycoside (2)                     | 13 |
| NOE of glycoside (2)                      | 14 |
| <sup>1</sup> H NMR of glycoside (3)       | 15 |
| <sup>13</sup> C NMR of glycoside (3)      | 16 |
| <sup>1</sup> H NMR of glycoside (4)       | 17 |
| <sup>13</sup> C NMR of glycoside (4)      | 18 |
| HMBC of glycoside (4)                     | 19 |
| Figure 1. Isolated structures             | 20 |
| Table 1. <sup>13</sup> C NMR spectra      | 21 |
| Table 2. <sup>1</sup> H NMR spectra       | 22 |

# Crude mixture after simple one step extraction

## Generic Display Report (all)

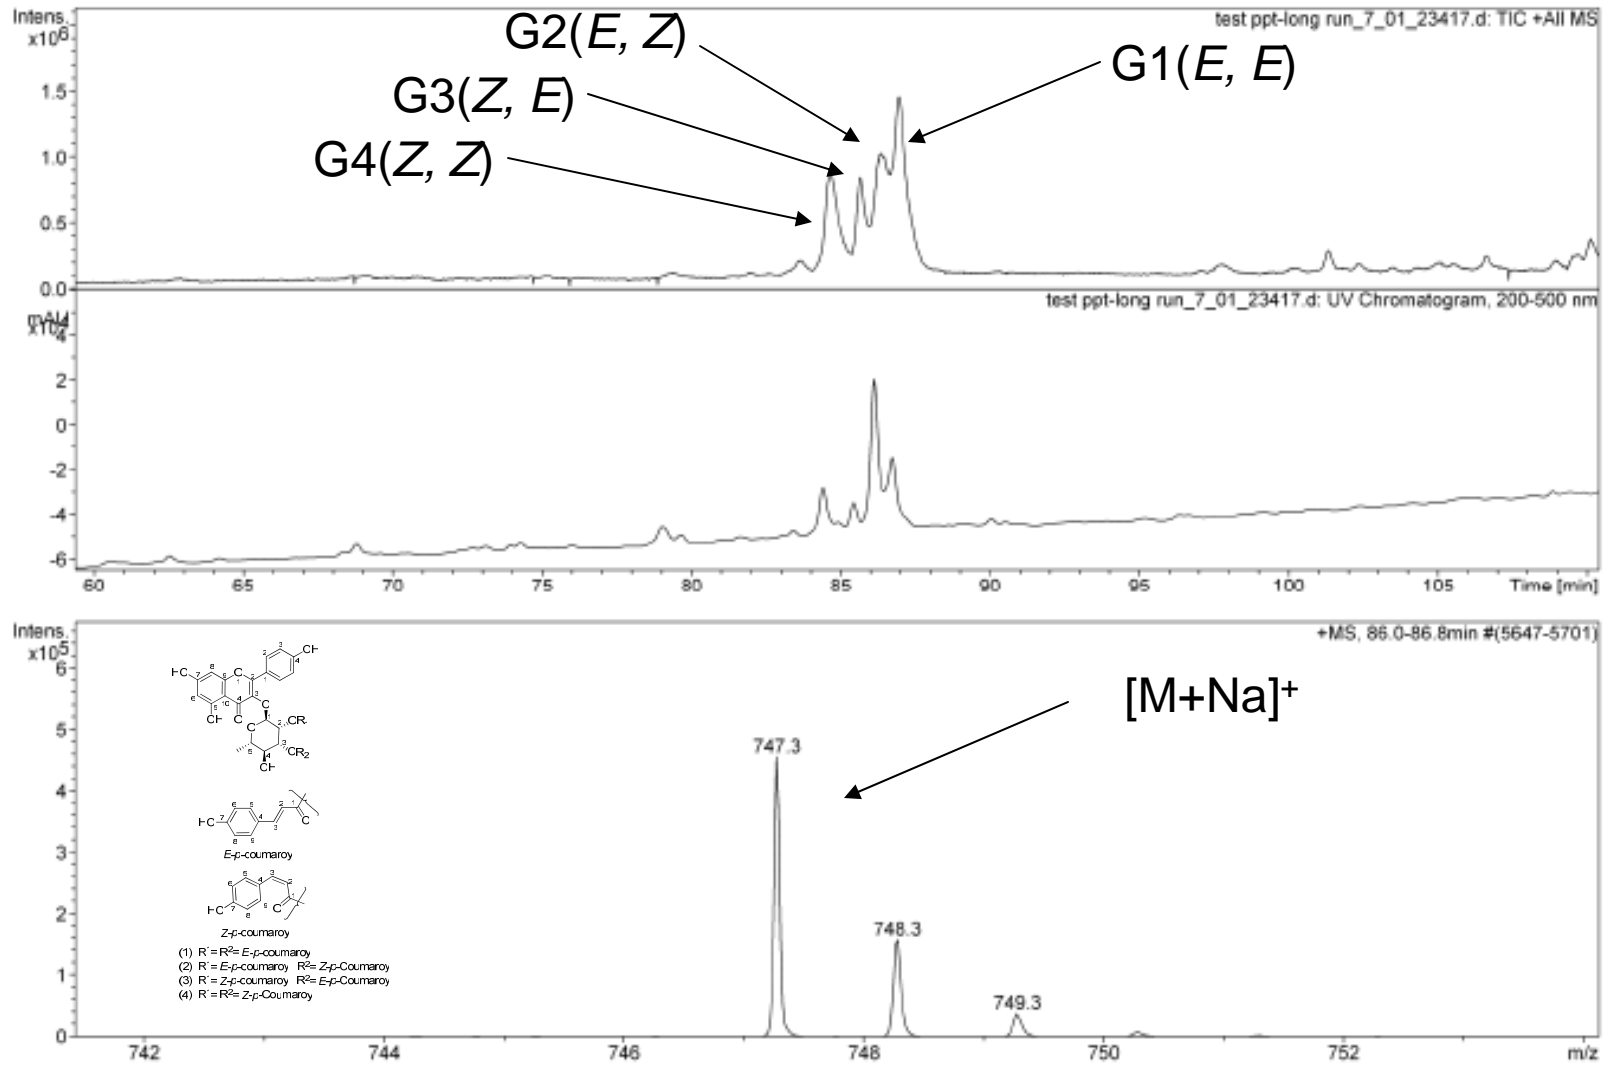

G1: glycoside 1, G2: glycoside 2, G3: glycoside 3, G4: glycoside 4

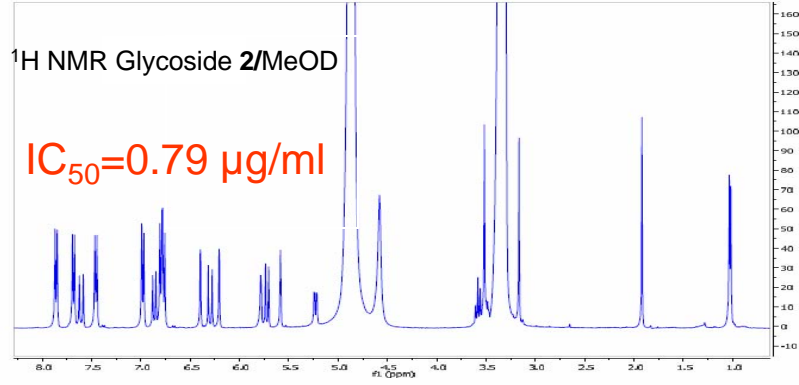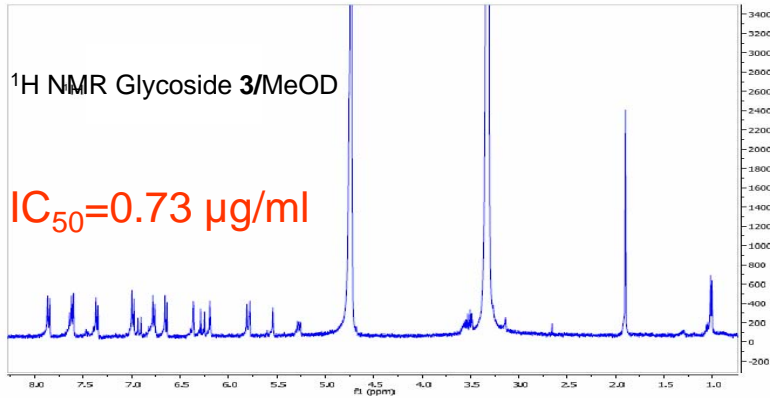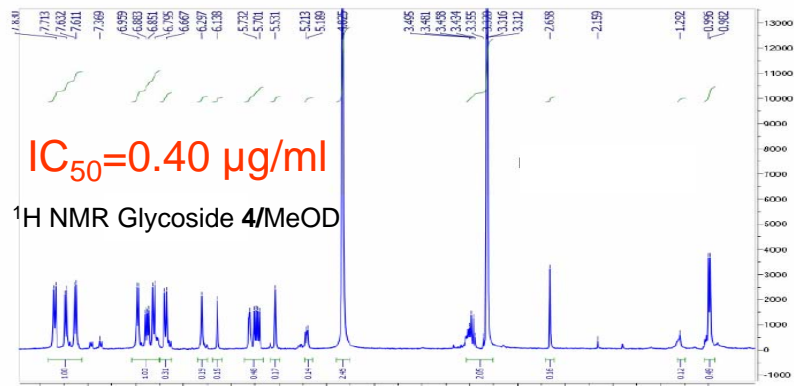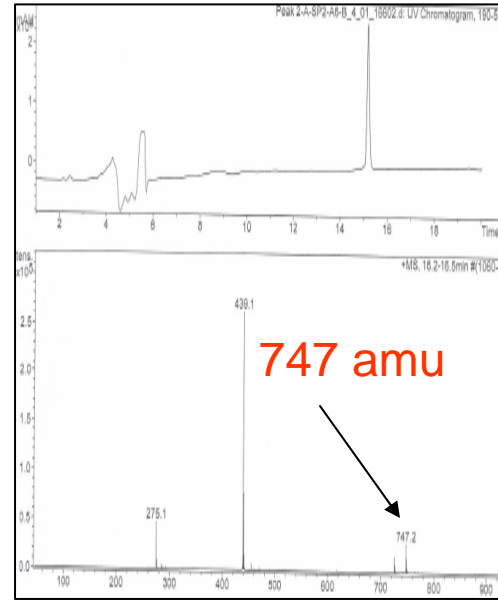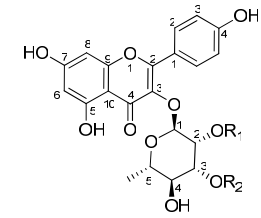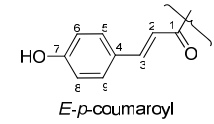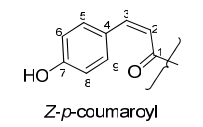

- (1), R<sup>1</sup> = R<sup>2</sup> = *E-p-coumaroyl*
- (2), R<sup>1</sup> = *E-p-coumaroyl*, R<sup>2</sup> = *Z-p-coumaroyl*
- (3), R<sup>1</sup> = *Z-p-coumaroyl*, R<sup>2</sup> = *E-p-coumaroyl*
- (4), R<sup>1</sup> = R<sup>2</sup> = *Z-p-coumaroyl*

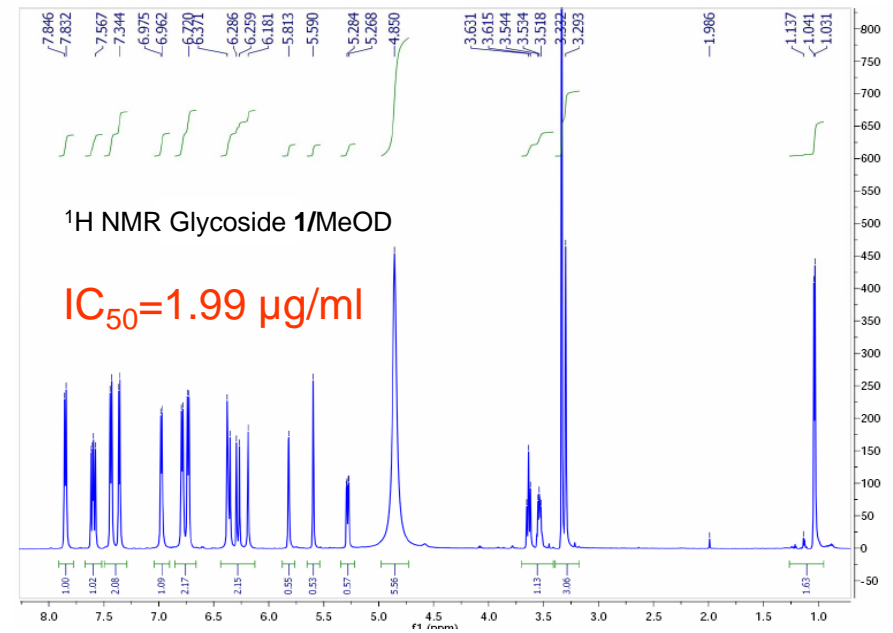

# In vivo assay

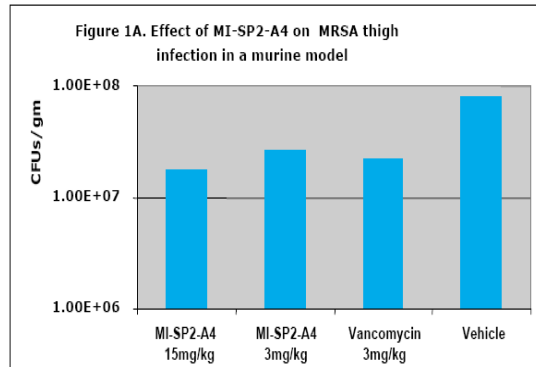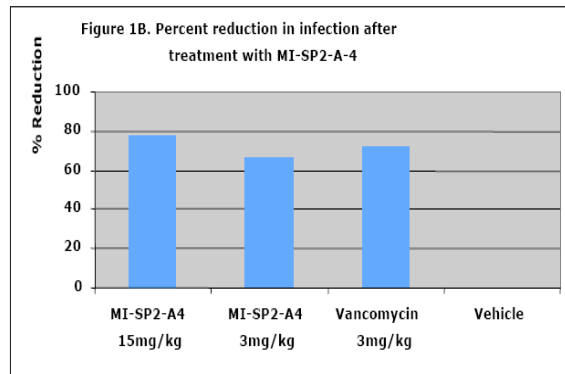

**NC = no cytotoxicity up to 100 µg/ml**

## Cancer Cells:

KB Human Epidermal Carcinoma, Oral  
BT-549 Ductal Carcinoma, Breast  
SK-OV -3 Human Ovary carcinoma

## Noncancer Cells:

Vero Monkey Kidney Fibroblasts  
LLC-PK11 Pig Kidney Epithelial Cells

“MI-SP2-A4” is glycoside 1

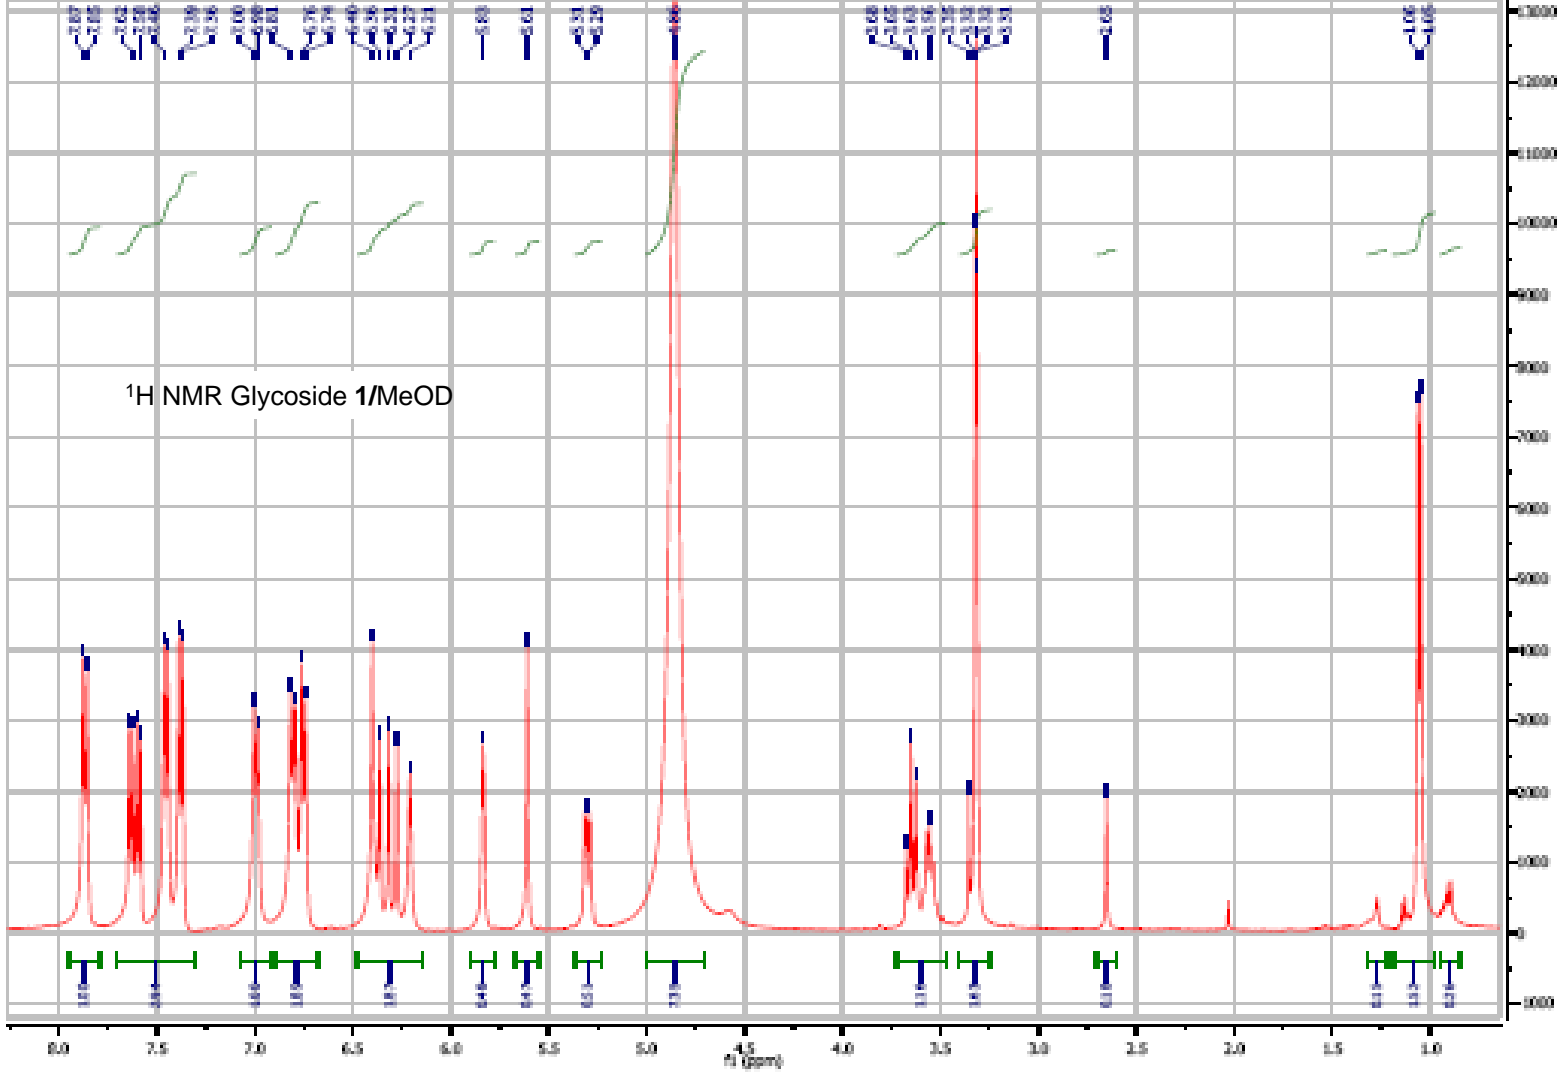

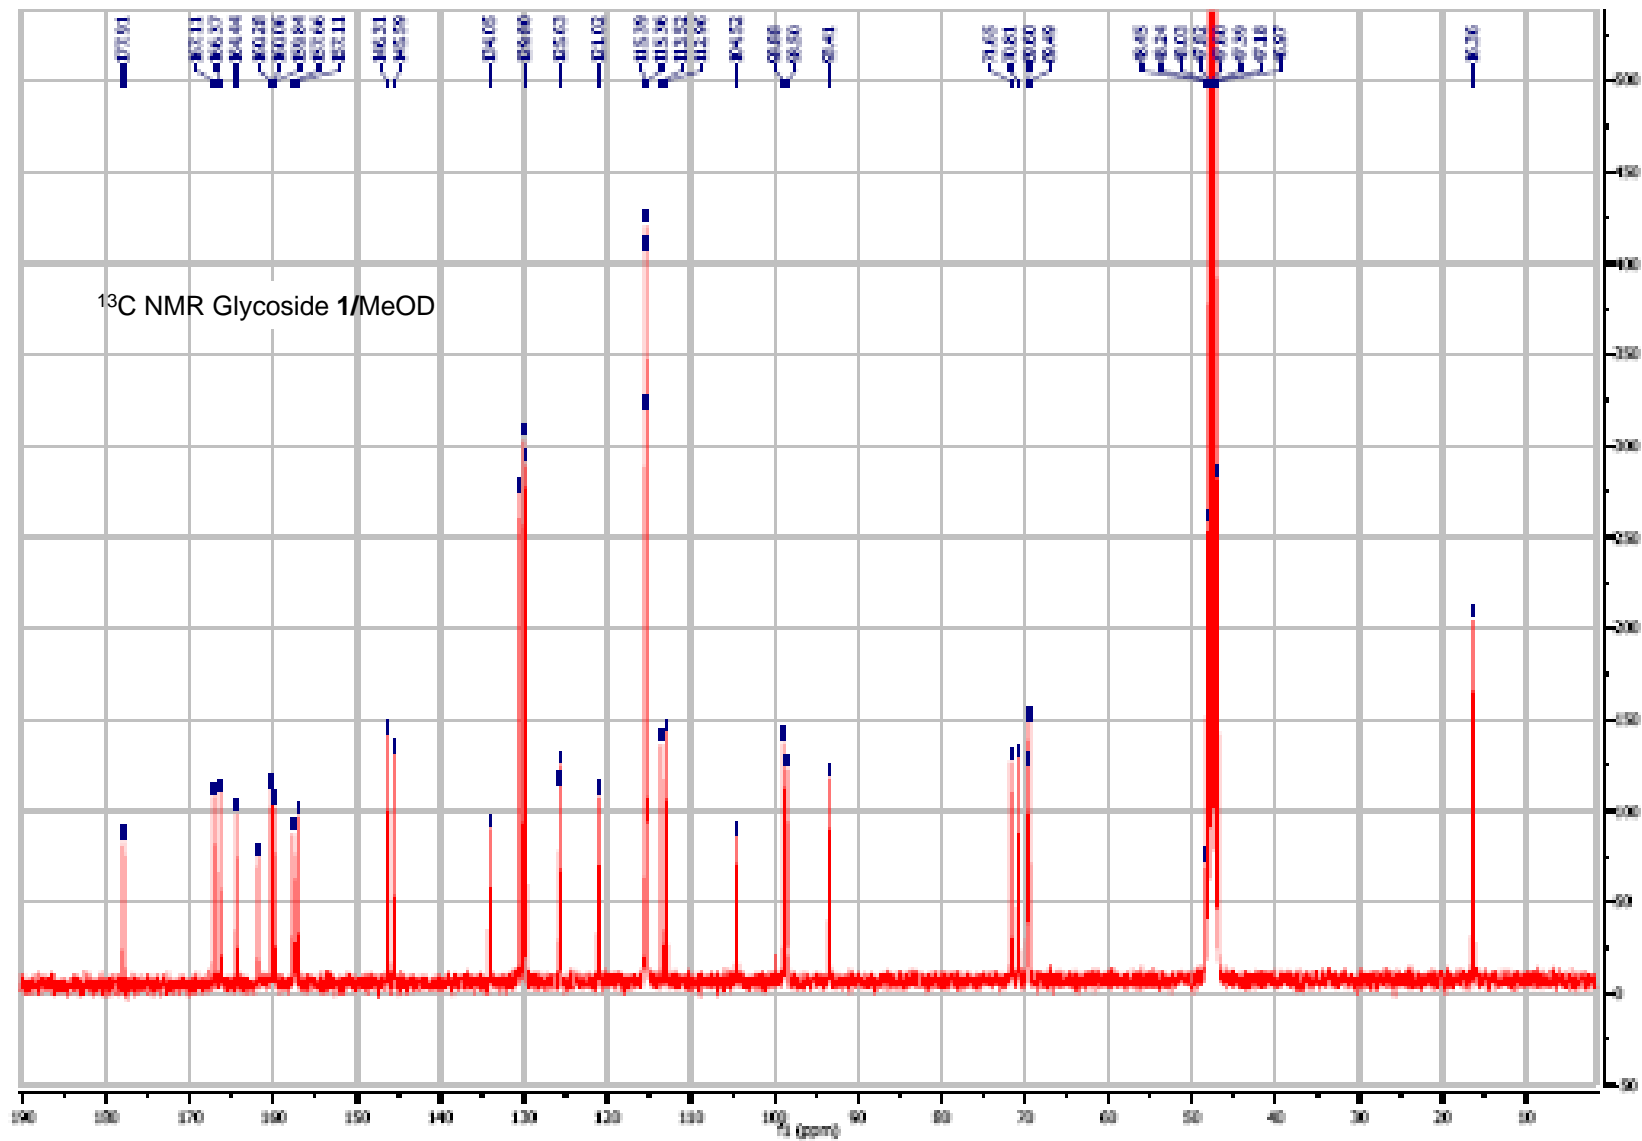

HSQC-Glycoside 1/MeOD

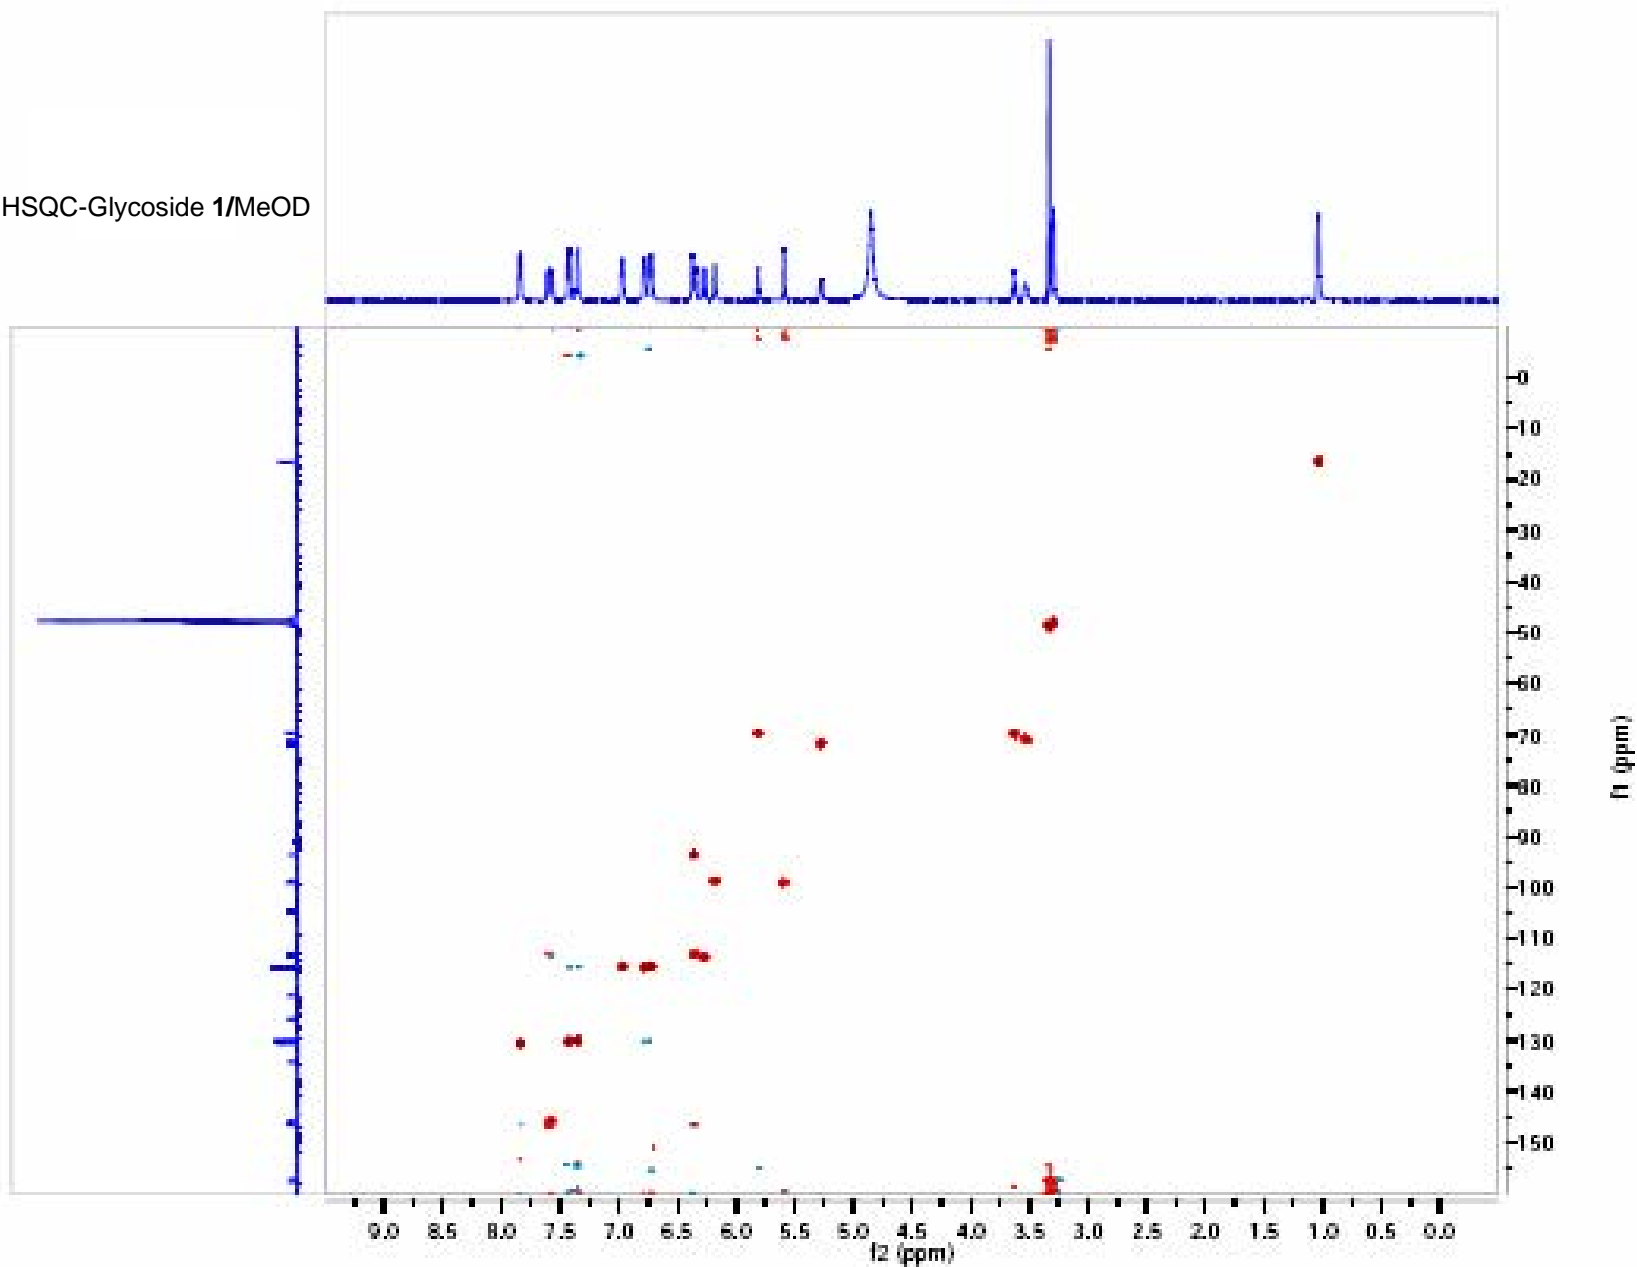



COSY-Glycoside 1/MeOD

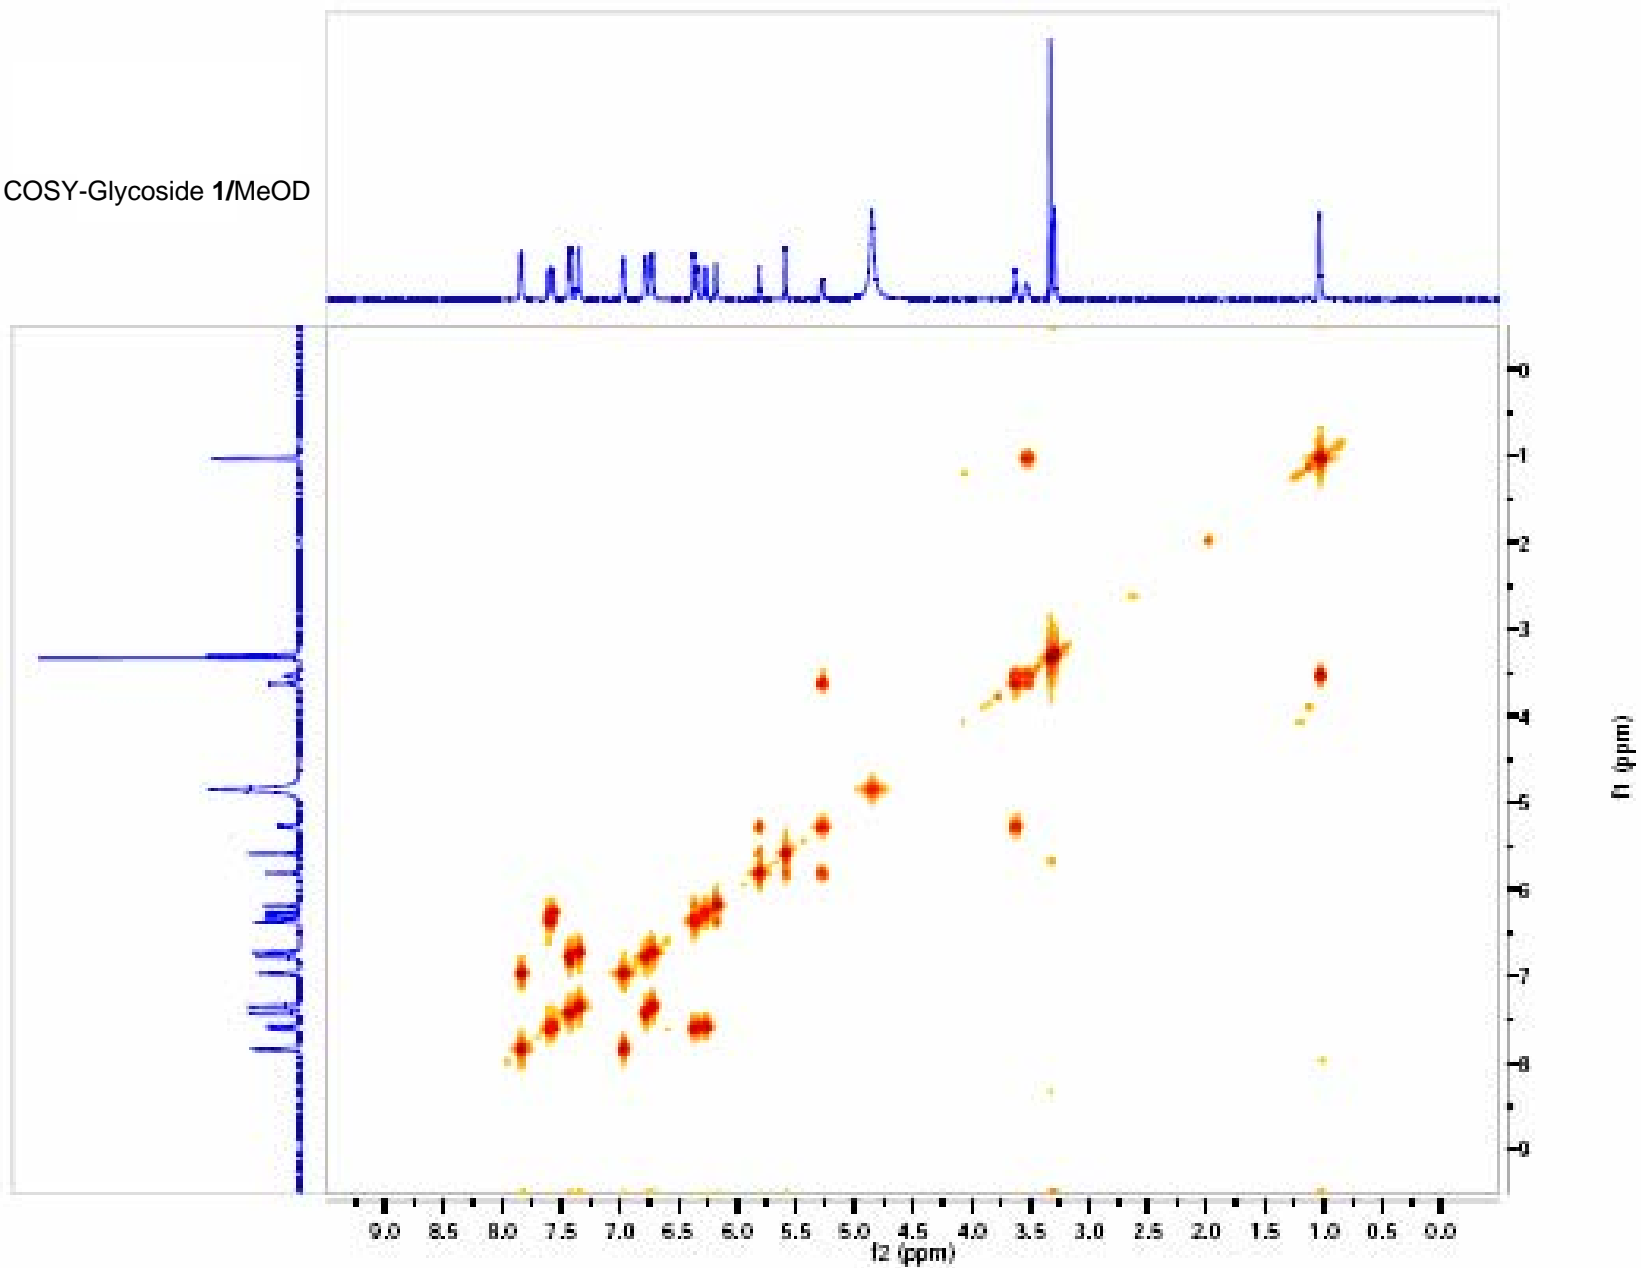

HMBC-Glycoside 1/MeOD

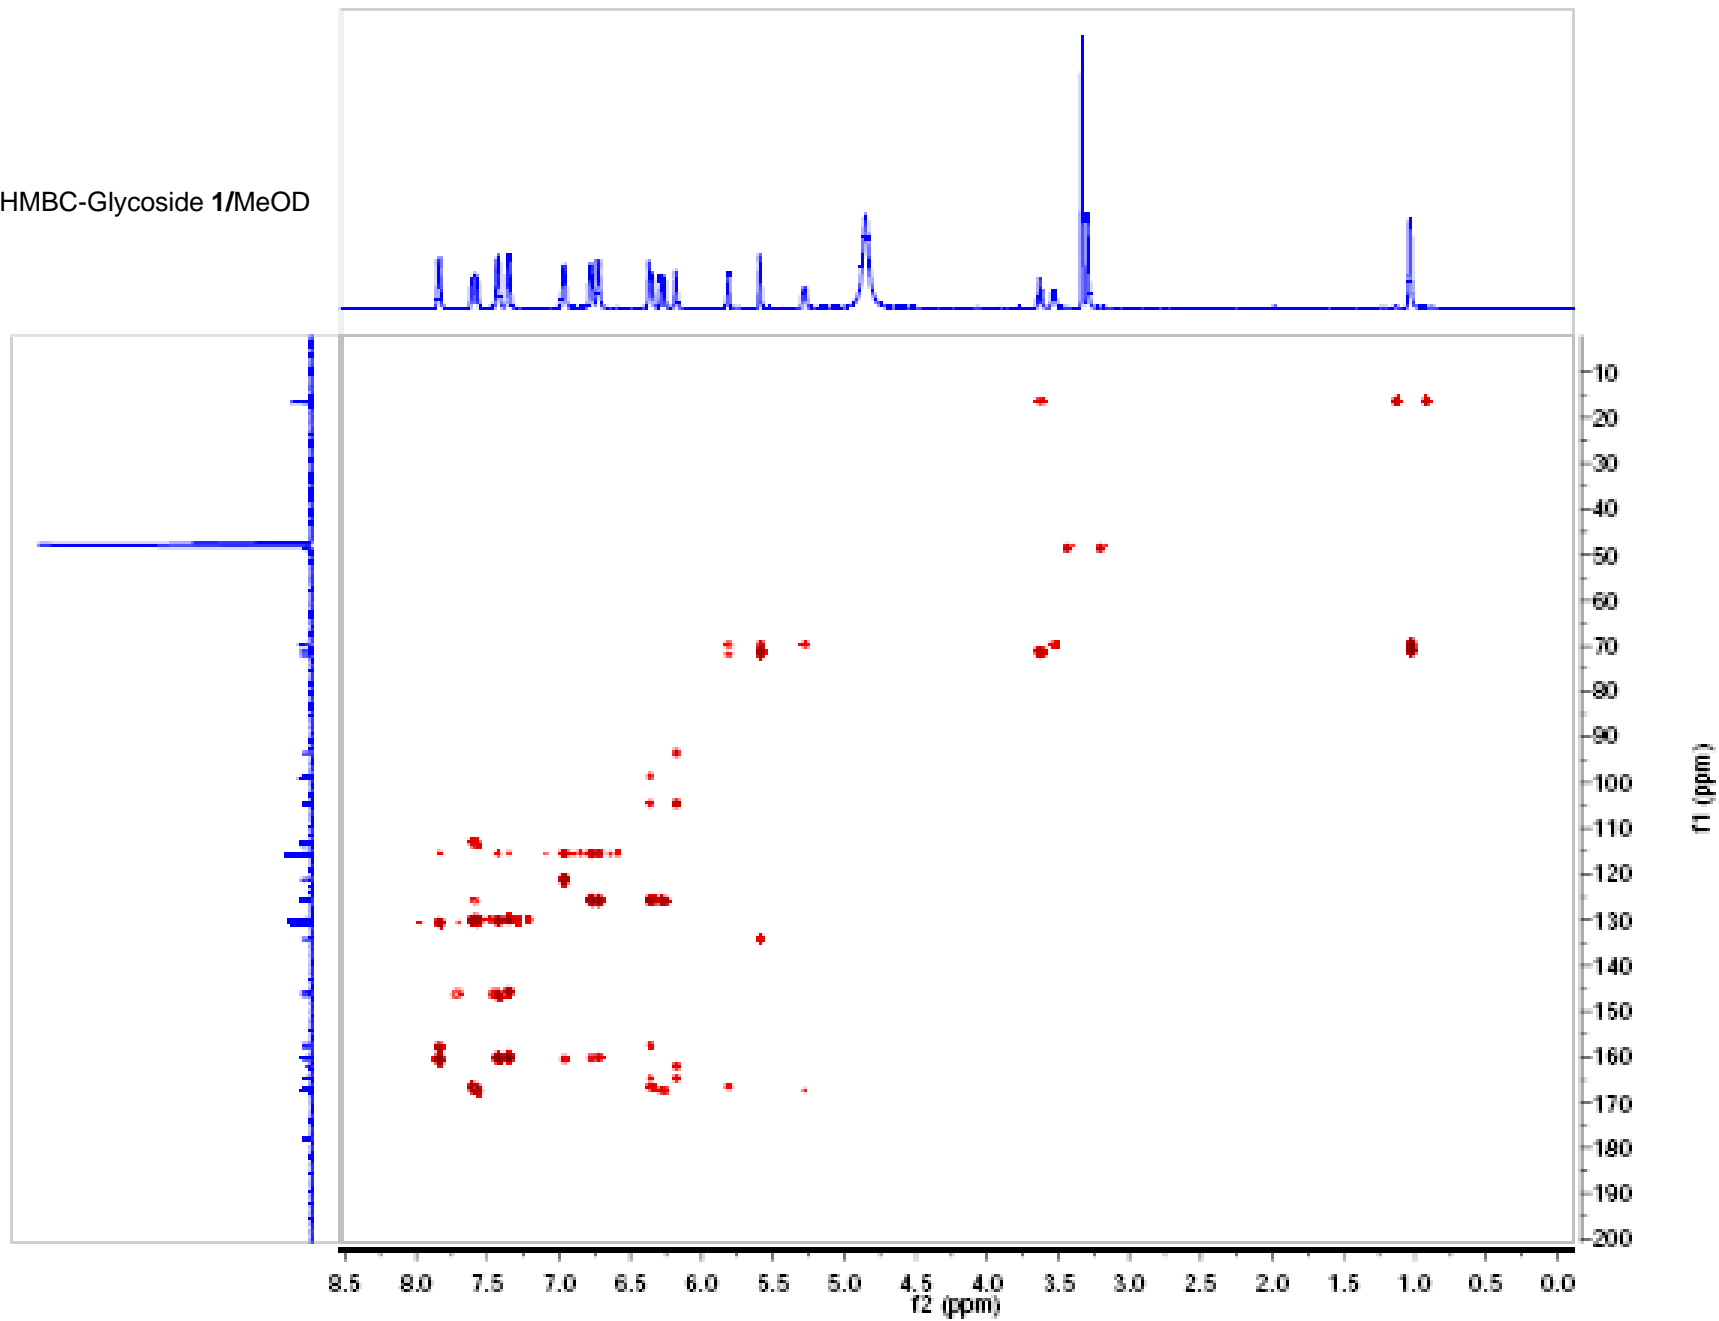

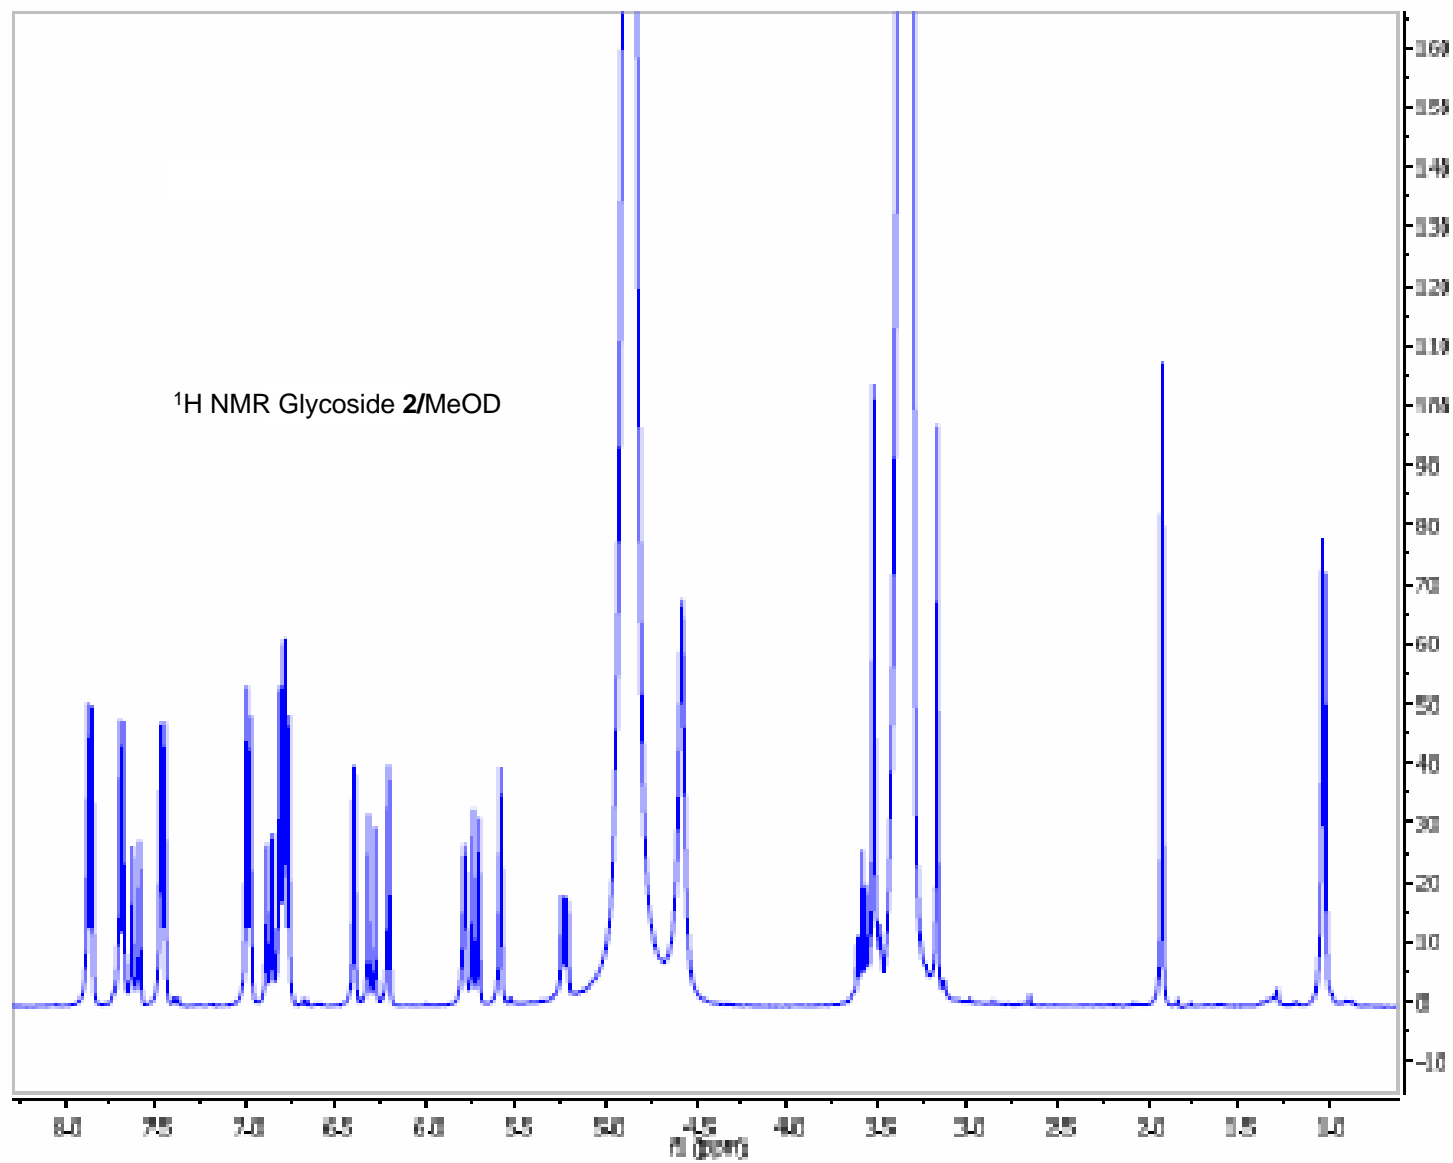

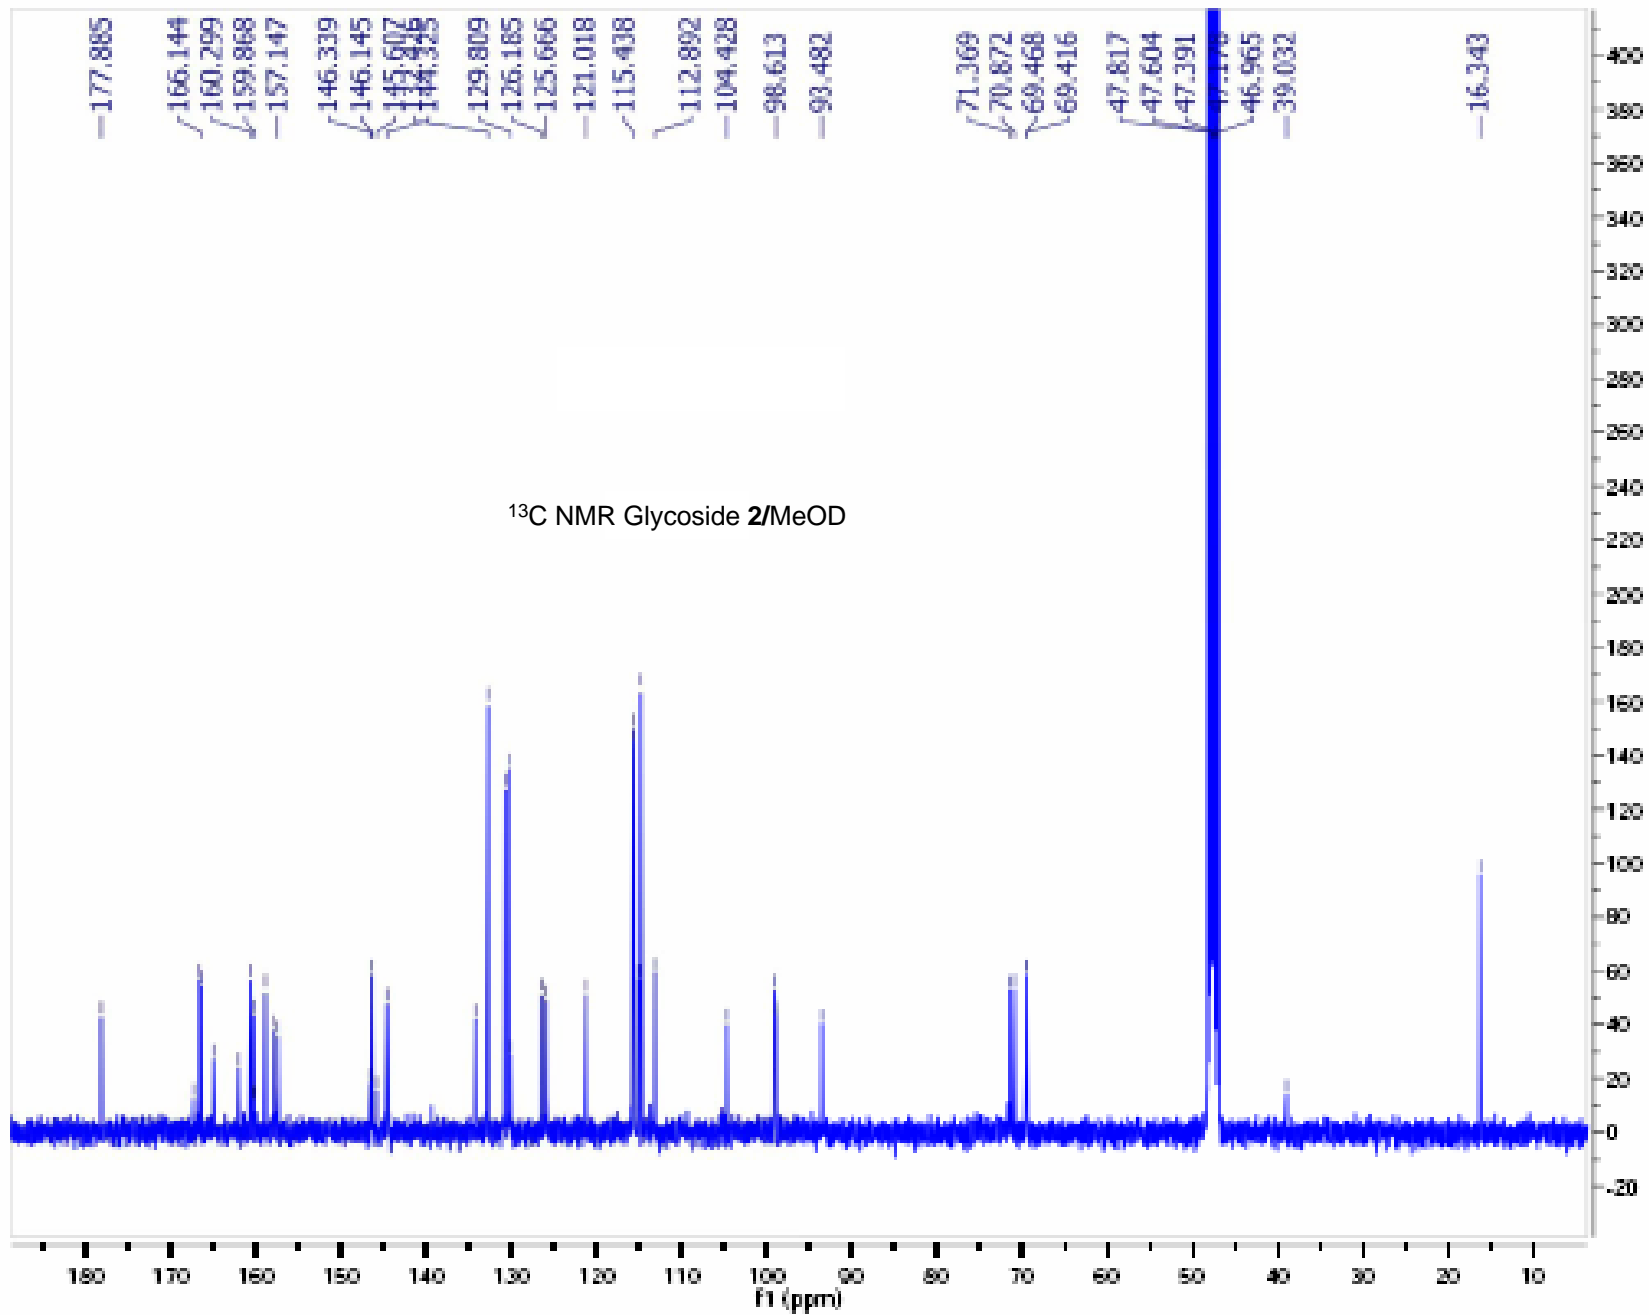

HMBC-Glycoside 2/MeOD

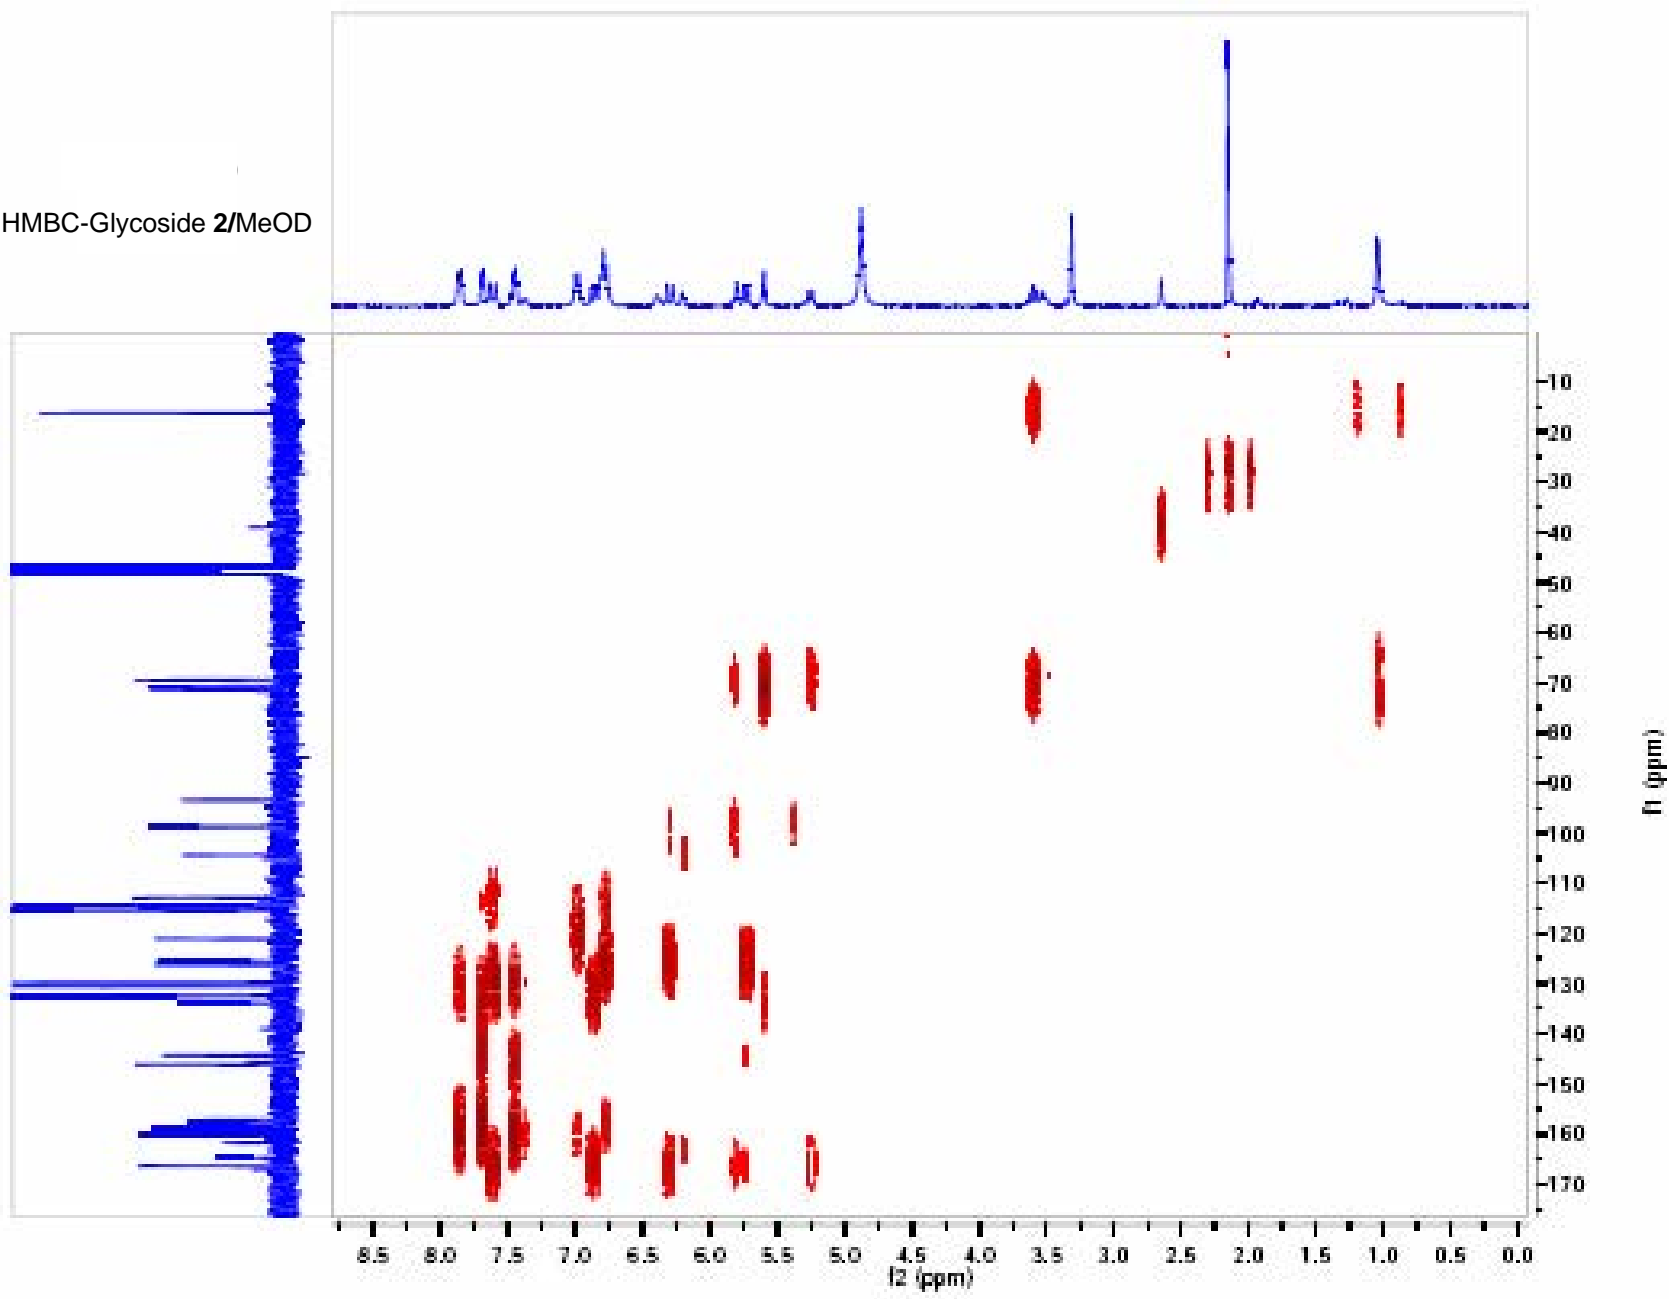

NOE-Glycoside **2**/MeOD

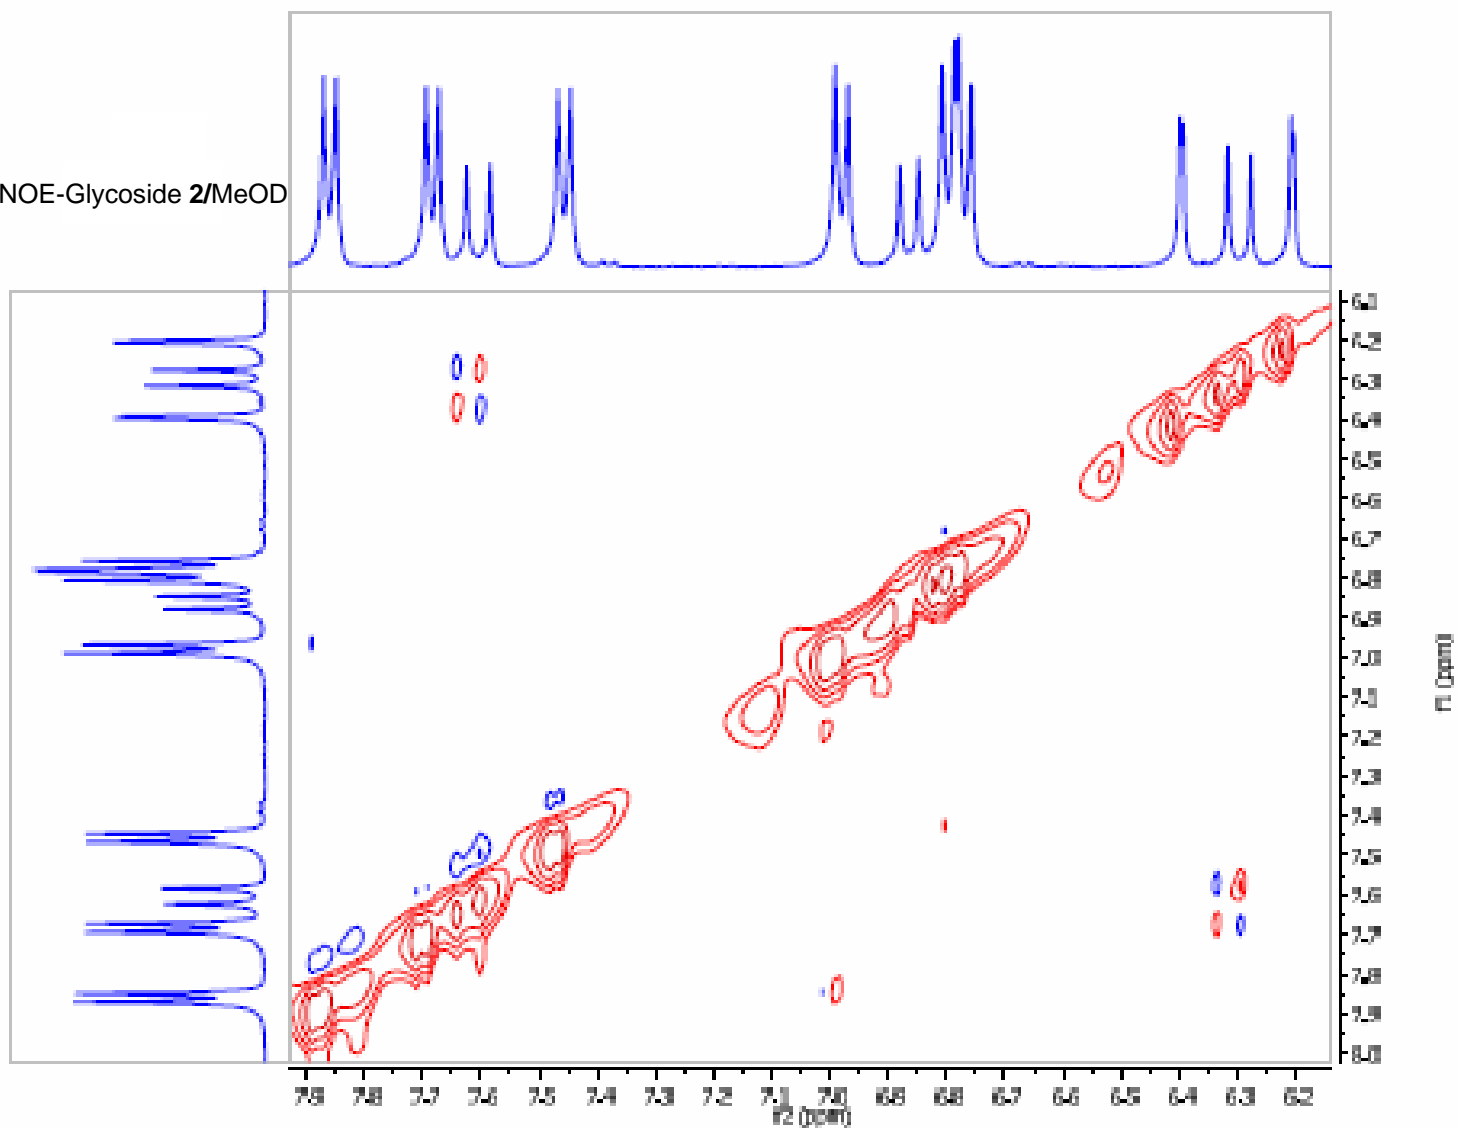

$^1\text{H}$  NMR Glycoside 3/MeOD

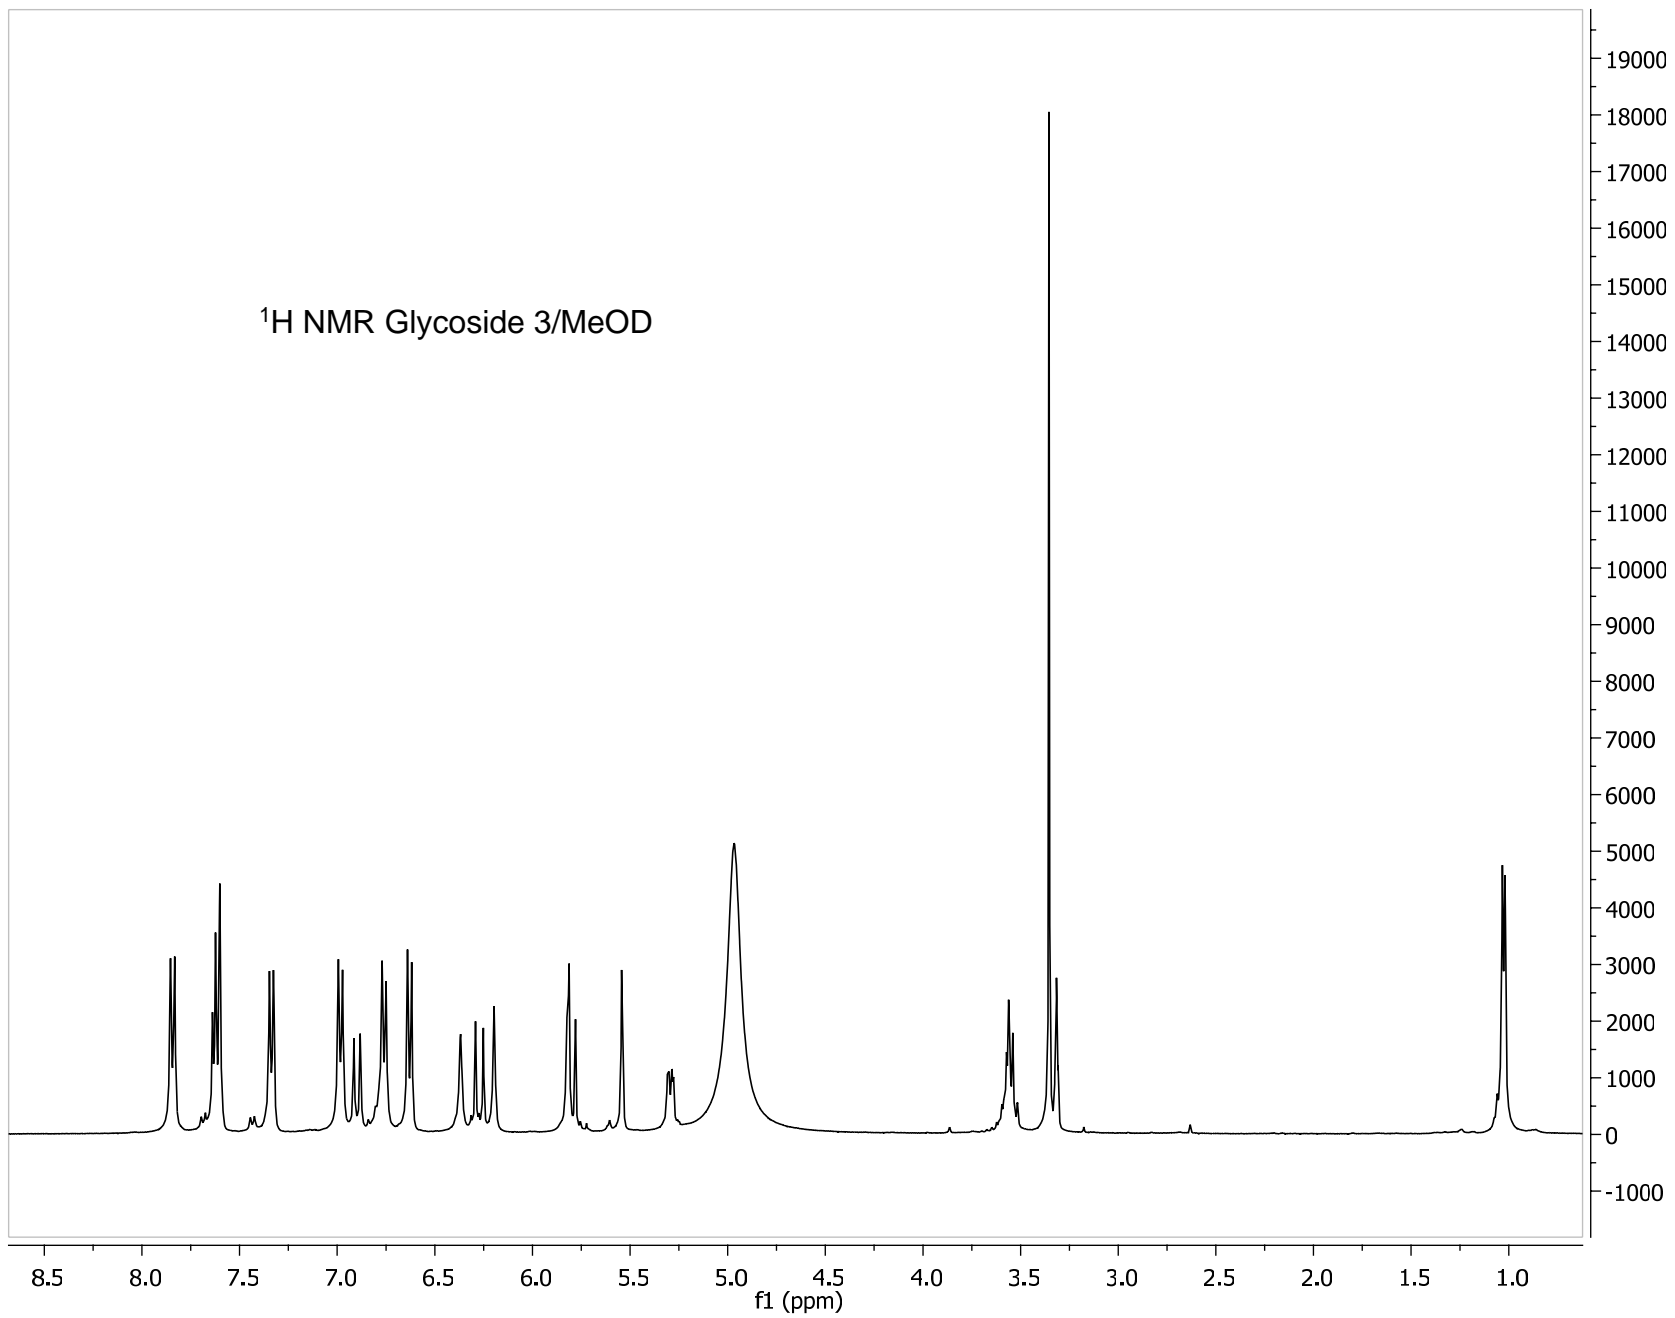

$^{13}\text{C}$  NMR Glycoside 3/MeOD

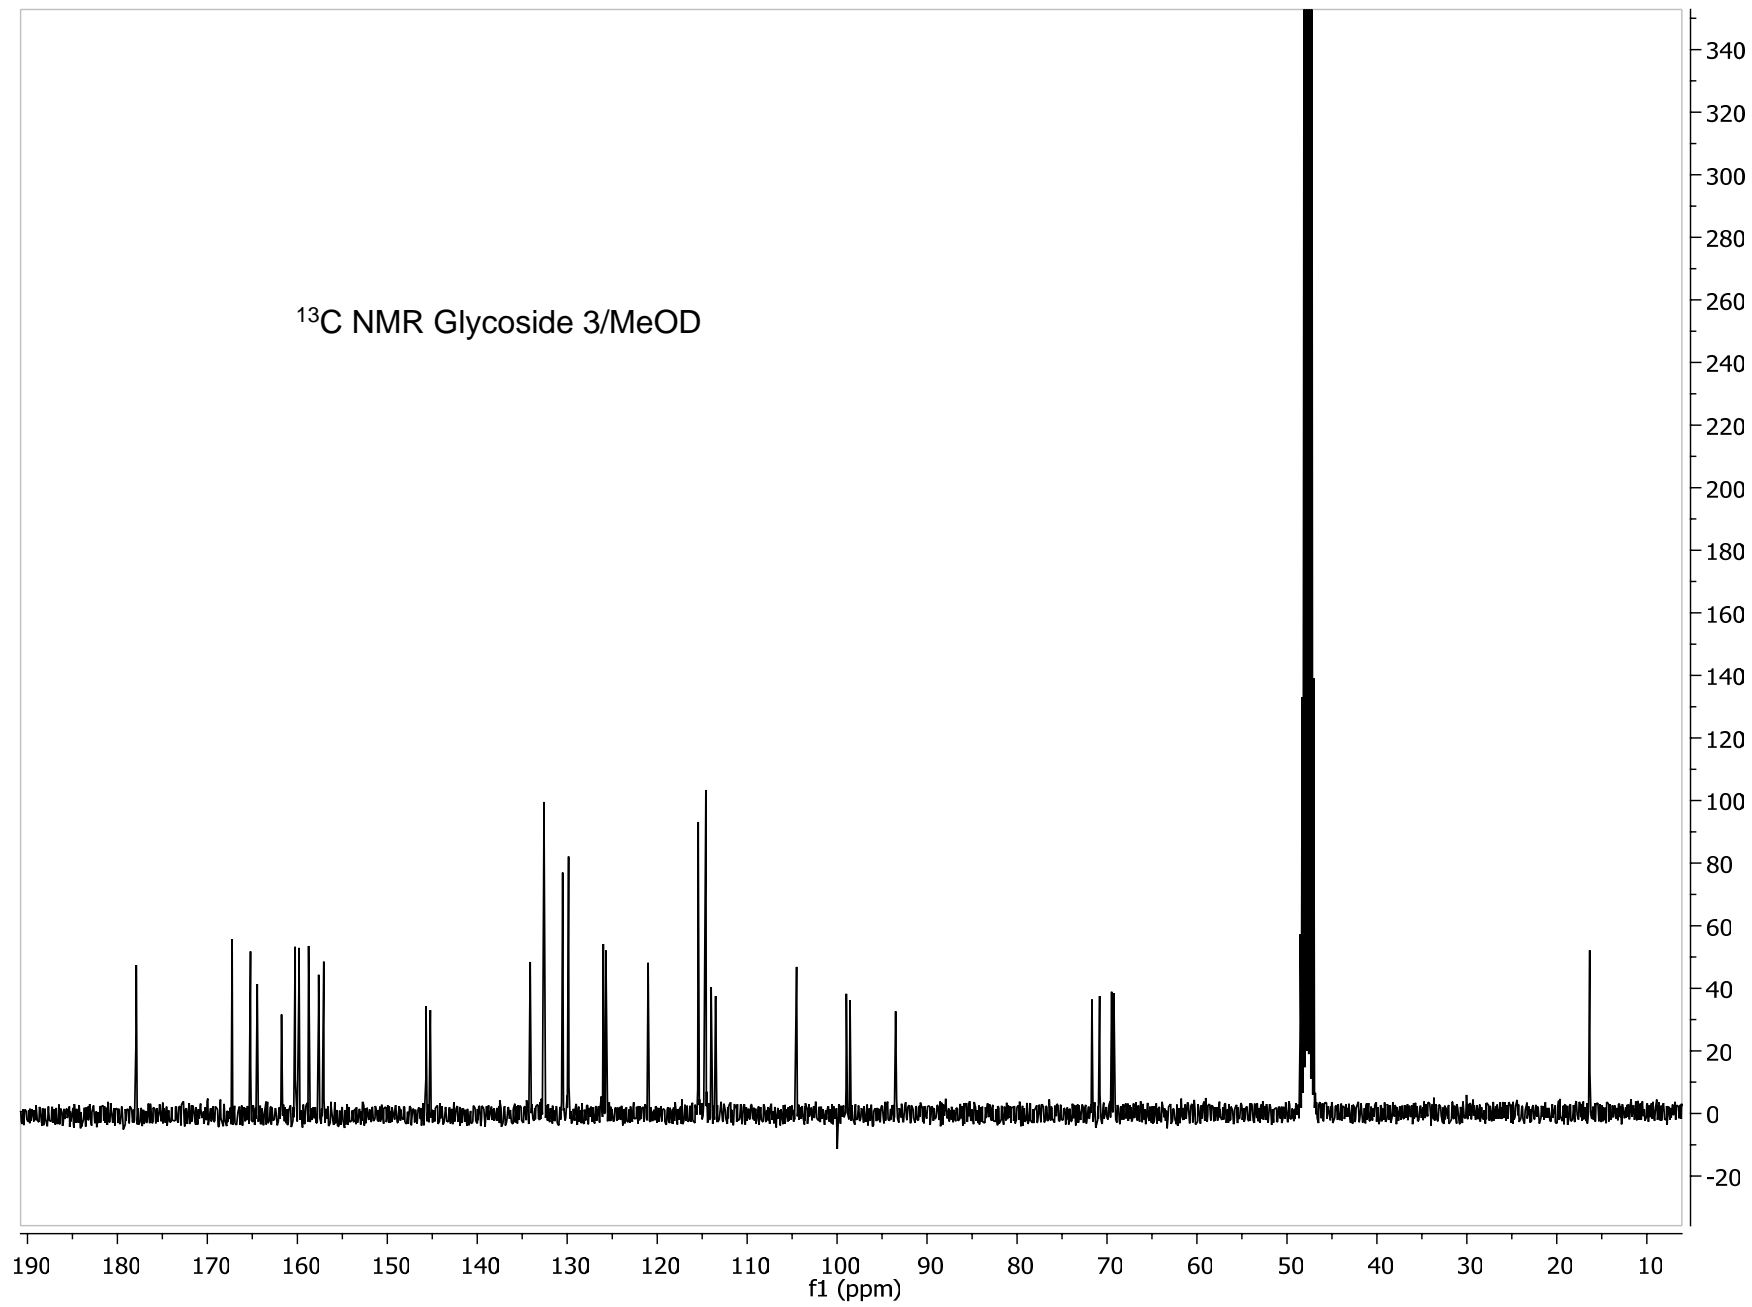



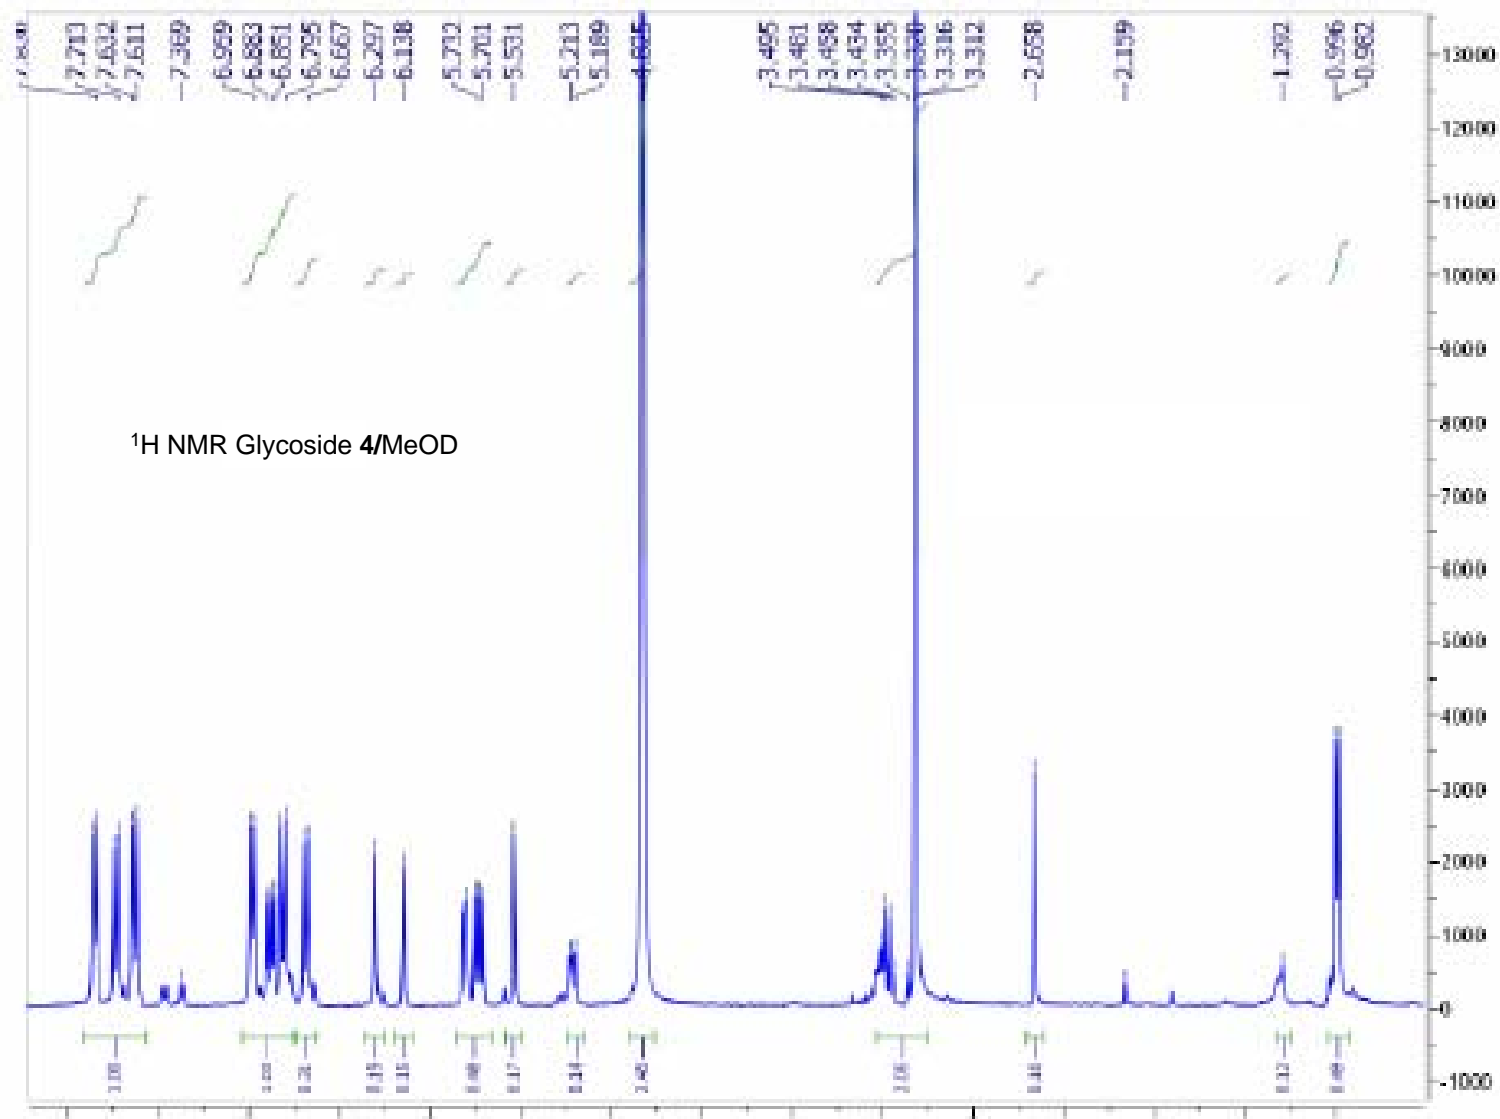

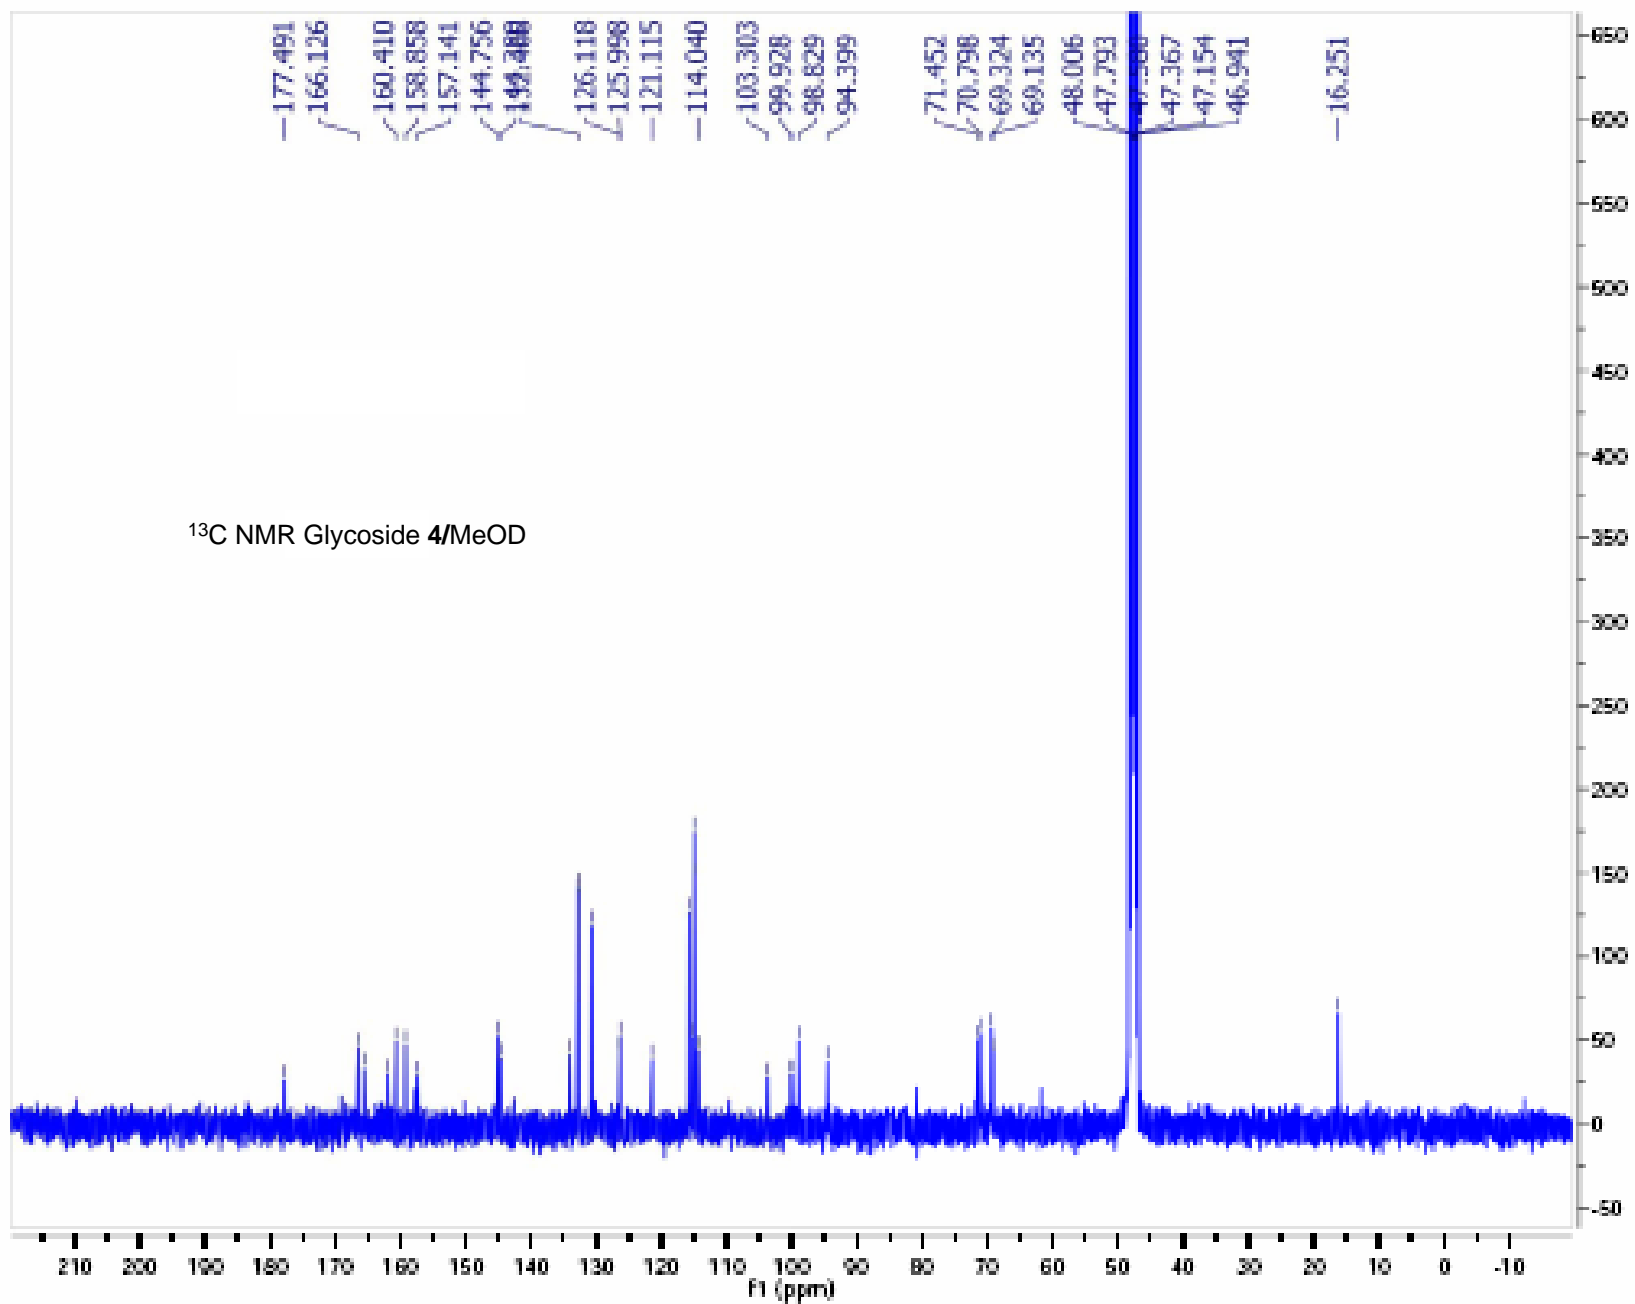

HMBC-Glycoside **4**/MeOD

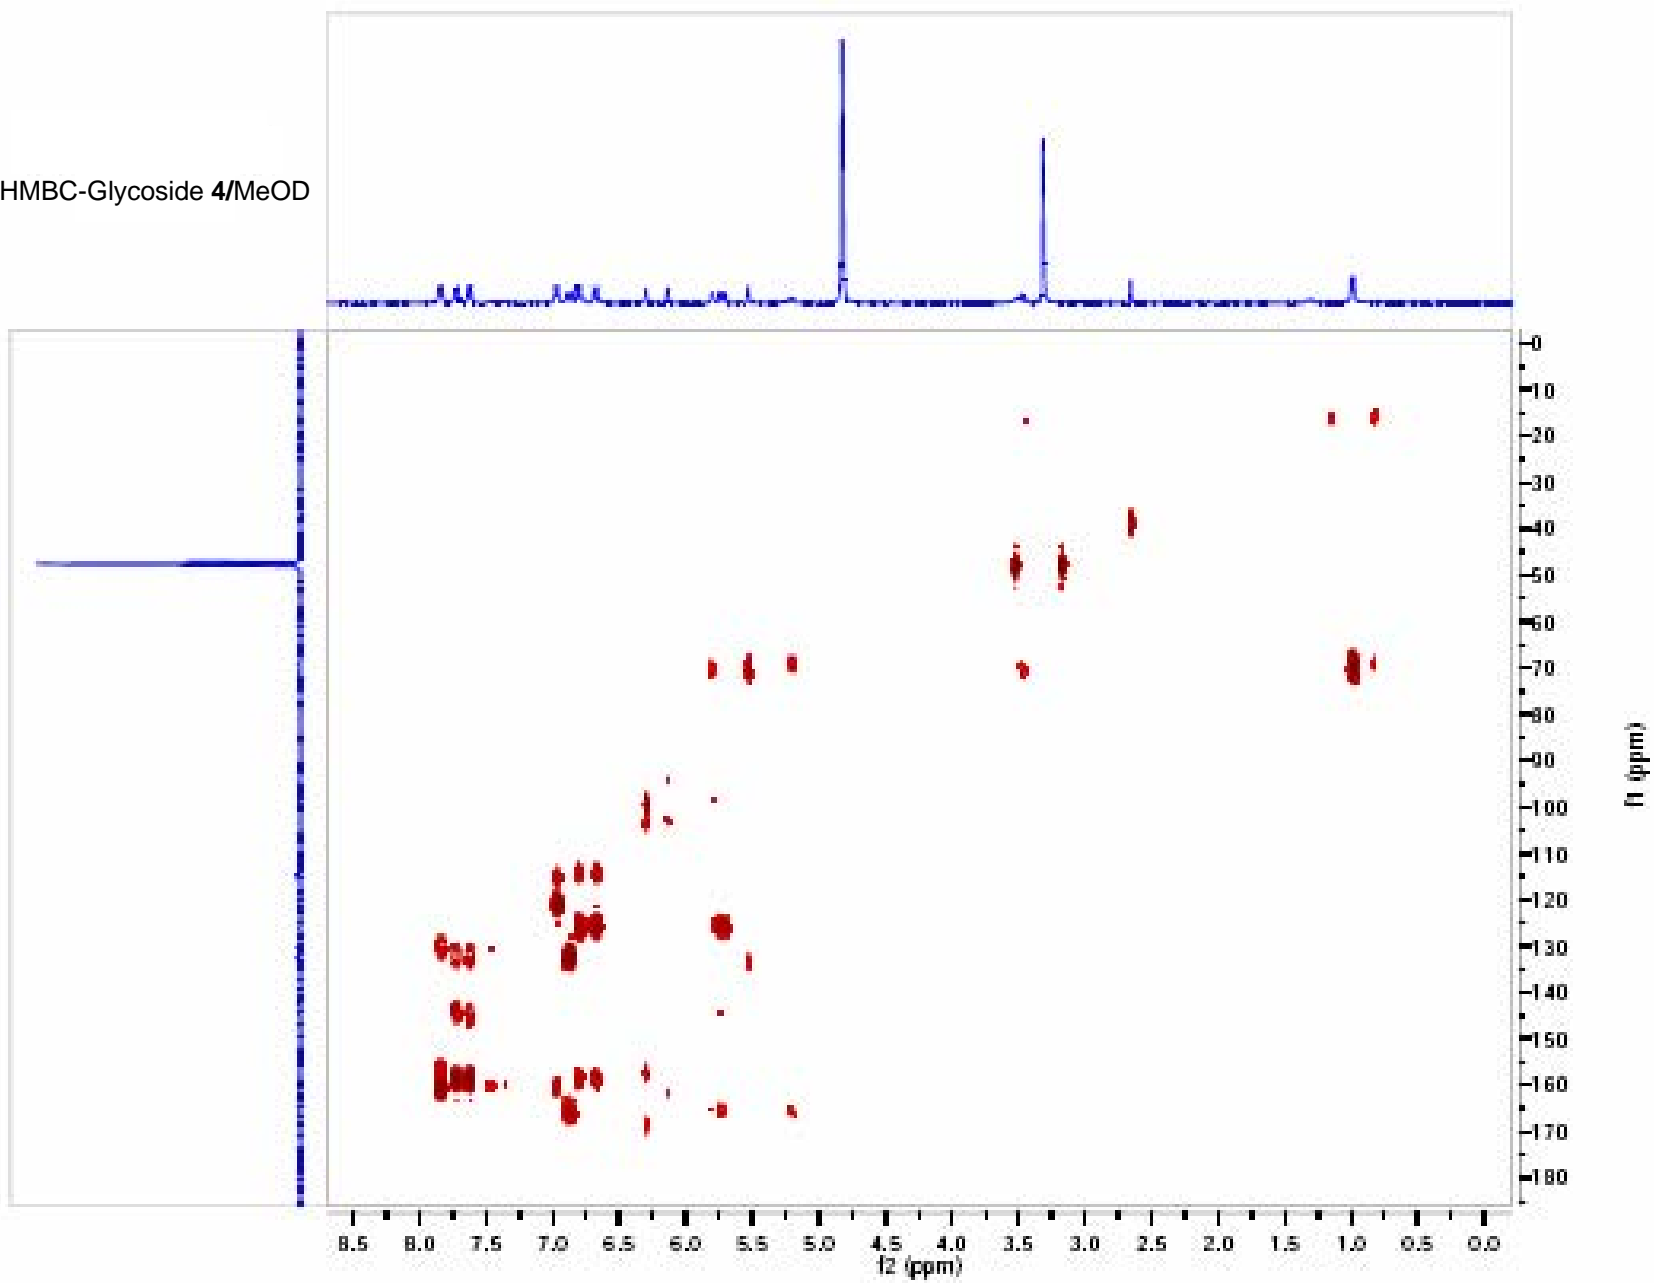

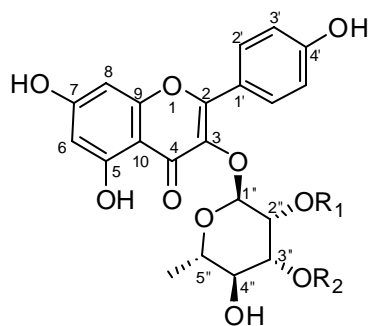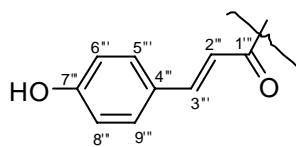

*E-p-coumaroyl*

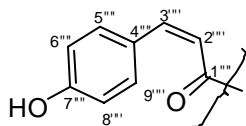

*Z-p-coumaroyl*

- 1,  $R^1 = R^2 = E-p\text{-coumaroyl}$
- 2,  $R^1 = E-p\text{-coumaroyl}$ ,  $R^2 = Z-p\text{-coumaroyl}$
- 3,  $R^1 = Z-p\text{-coumaroyl}$ ,  $R^2 = E-p\text{-coumaroyl}$
- 4,  $R^1 = R^2 = Z-p\text{-coumaroyl}$

**Table 1.** The  $^{13}\text{C}$  NMR for the four glycosides **1-4**:

| <b>Carbon no.</b>        | <b><math>^{13}\text{C}</math> NMR (Ref.) <math>\delta_{\text{C}}</math>, mult.</b> | <b><math>^{13}\text{C}</math> NMR (1), <math>\delta_{\text{C}}</math></b> | <b><math>^{13}\text{C}</math> NMR (2), <math>\delta_{\text{C}}</math></b> | <b><math>^{13}\text{C}</math> NMR (3), <math>\delta_{\text{C}}</math></b> | <b><math>^{13}\text{C}</math> NMR (4), <math>\delta_{\text{C}}</math></b> |
|--------------------------|------------------------------------------------------------------------------------|---------------------------------------------------------------------------|---------------------------------------------------------------------------|---------------------------------------------------------------------------|---------------------------------------------------------------------------|
| 2                        | 158.8, qC                                                                          | 157.9                                                                     | 157.7                                                                     | 157.6                                                                     | 157.5                                                                     |
| 3                        | 135.2, qC                                                                          | 134.2                                                                     | 134.0                                                                     | 134.1                                                                     | 133.7                                                                     |
| 4                        | 178.9, qC                                                                          | 178.1                                                                     | 177.9                                                                     | 177.9                                                                     | 177.5                                                                     |
| 5                        | 163.0, qC                                                                          | 162.0                                                                     | 161.8                                                                     | 161.8                                                                     | 161.6                                                                     |
| 6                        | 100.2, CH                                                                          | 98.7                                                                      | 98.6                                                                      | 98.6                                                                      | 99.9                                                                      |
| 7                        | 165.8, qC                                                                          | 164.7                                                                     | 164.8                                                                     | 164.5                                                                     | 165.3                                                                     |
| 8                        | 95.7, CH                                                                           | 93.6                                                                      | 93.48                                                                     | 93.5                                                                      | 94.4                                                                      |
| 9                        | 158.8, qC                                                                          | 157.3                                                                     | 157.1                                                                     | 157.1                                                                     | 157.1                                                                     |
| 10                       | 104.8, qC                                                                          | 104.7                                                                     | 104.4                                                                     | 104.6                                                                     | 103.3                                                                     |
| 1'                       | 122.5, qC                                                                          | 121.2                                                                     | 121.0                                                                     | 121.2                                                                     | 121.1                                                                     |
| 2', 6'                   | 131.8, CH                                                                          | 130.7                                                                     | 130.5                                                                     | 130.5                                                                     | 130.4                                                                     |
| 3', 5'                   | 116.9a, CH                                                                         | 115.6                                                                     | 115.4                                                                     | 115.4                                                                     | 115.4                                                                     |
| 4'                       | 161.5, qC                                                                          | 160.5                                                                     | 160.3                                                                     | 160.2                                                                     | 160.4                                                                     |
| 1''                      | 101.2, CH                                                                          | 99.1                                                                      | 98.8                                                                      | 98.9                                                                      | 98.9                                                                      |
| 2''                      | 72.2, CH                                                                           | 69.7                                                                      | 69.4                                                                      | 69.3                                                                      | 69.1                                                                      |
| 3''                      | 73.1, CH                                                                           | 71.9                                                                      | 71.4                                                                      | 71.7                                                                      | 71.5                                                                      |
| 4''                      | 71.0b, CH                                                                          | 69.8                                                                      | 69.5                                                                      | 69.5                                                                      | 69.3                                                                      |
| 5''                      | 70.9b, CH                                                                          | 71.0                                                                      | 70.9                                                                      | 70.8                                                                      | 70.8                                                                      |
| 6''                      | 17.8, CH <sub>3</sub>                                                              | 16.6                                                                      | 16.3                                                                      | 16.30                                                                     | 16.3                                                                      |
| 1''', 1''''              | 167.8, 168.5, qC                                                                   | 166.6, 167.3                                                              | 166.4, 166.1                                                              | 167.3, 165.2                                                              | 166.1, 166.2                                                              |
| 2''', 2''''              | <b>114.2, 114.8, CH</b>                                                            | <b>113.1, 113.7</b>                                                       | <b>112.9, 114.8</b>                                                       | <b>113.5, 114.1</b>                                                       | <b>114.0, 114.8</b>                                                       |
| 3''', 3''''              | <b>147.0, 147.8, CH</b>                                                            | <b>145.8, 146.5</b>                                                       | <b>146.2, 144.3</b>                                                       | <b>145.6, 145.2</b>                                                       | <b>144.4, 144.8</b>                                                       |
| 4''', 4''''              | 126.9, 127.0, qC                                                                   | 125.8, 125.9                                                              | 125.7, 126.2                                                              | 125.7, 126.0                                                              | 126.0, 126.1                                                              |
| 5''', 9''', 5'''', 9'''' | 131.2, 131.4, CH                                                                   | 130.0, 130.2                                                              | 130.0, 132.4                                                              | 129.8, 132.4                                                              | 132.5, 132.5                                                              |
| 6''', 8''', 6'''', 8'''' | 116.8a, 117.0a, CH                                                                 | 115.6, 115.7                                                              | 114.5, 115.4                                                              | 114.6, 115.5                                                              | 114.5, 114.6                                                              |
| 7''', 7''''              | 161.8, 161.8, qC                                                                   | 160.1, 160.3                                                              | 160.0, 158.7                                                              | 159.8, 158.7                                                              | 158.8, 158.9                                                              |

<sup>a, b</sup> Assignments bearing the same superscript in any one spectrum may be reversed. Reference compound measured at 300 MHz / MeOD.<sup>17</sup> Compounds (**1-4**) measured at 400 MHz / MeOD.

**Table 2.** <sup>1</sup>H NMR, COSY and HMBC for glycoside **1** and <sup>1</sup>H NMR for glycosides **2-4**.

| Proton no.               | glycoside (1)                                   |                                                   |            |                              | glycoside (2)                                     | glycoside (3)                                     | glycoside (4)                                     |
|--------------------------|-------------------------------------------------|---------------------------------------------------|------------|------------------------------|---------------------------------------------------|---------------------------------------------------|---------------------------------------------------|
|                          | <sup>1</sup> H NMR (Ref) δ <sub>H</sub> , mult. | <sup>1</sup> H NMR δ <sub>H</sub> (J value in Hz) | COSY       | HMBC                         | <sup>1</sup> H NMR δ <sub>H</sub> (J value in Hz) | <sup>1</sup> H NMR δ <sub>H</sub> (J value in Hz) | <sup>1</sup> H NMR δ <sub>H</sub> (J value in Hz) |
| 6                        | 6.10, br s                                      | 6.16, s                                           | --         | 93.6, 104.7, 162.0, 164.7    | 6.26, s                                           | 6.22, s                                           | 6.13, S                                           |
| 8                        | 6.26, br s                                      | 6.36, s                                           | -          | 98.7, 104.7, 157.3, 164.7    | 6.39, bs                                          | 6.41, bs                                          | 6.30, Bs                                          |
| 2', 6'                   | 7.81, d                                         | 7.83, d (8.4)                                     | 6.96       | 157.9, 160.5                 | 7.87, d (8.4)                                     | 7.86, d (8.8)                                     | 7.83, d (8.4)                                     |
| 3', 5'                   | 6.93, d                                         | 6.96, d (7.8)                                     | 7.84       | 121.2, 130.7, 160.5          | 7.01, d (8.4)                                     | 6.98, d (8.8)                                     | 6.96, d (8.4)                                     |
| 1''                      | 5.55 (d)                                        | 5.57, s                                           | -          | 71.0, 134.2                  | 5.56, s                                           | 5.54, s                                           | 5.52, S                                           |
| 2''                      | 5.77 (dd)                                       | 5.81, brs                                         | 5.27       | 166.6, 71.9                  | 5.78, brs                                         | 5.78, brs                                         | 5.79, brs                                         |
| 3''                      | 5.25 (dd)                                       | 5.27, dd (9.6, 3.2)                               | 5.81, 3.62 | 69.7, 167.3                  | 5.27, dd (9.6, 3.2)                               | 5.27, dd (9.2, 3.2)                               | 5.21, dd (9.2, 3.2)                               |
| 4''                      | 3.59 (t)                                        | 3.62, t, (9.6)                                    | 5.27, 3.53 | 16.6, 71.0                   | 3.58, t, (9.6)                                    | 3.49, t (9.2)                                     | 3.48, t, (9.6)                                    |
| 5''                      | 3.50 (m)                                        | 3.53, m                                           | 1.03, 3.62 | 69.8                         | 3.52, m                                           | 3.53, m                                           | 3.52, m                                           |
| 6''                      | 0.99 (d)                                        | 1.03, d (6.0)                                     | 3.53       | 71.0                         | 1.04, d (6.0)                                     | 1.00, d (6.0)                                     | 0.97, d (5.6)                                     |
| 2''', 2''''              | 6.24 (d), 6.33 (d)                              | <b>6.34, d (15.6), 6.28, d (15.6)</b>             | 7.61, 7.56 | (125.8, 166.6), (125, 167.3) | <b>6.31, d (16.0), 5.72, d (12.8)</b>             | <b>6.30, d (16.0), 5.81, d (12.8)</b>             | <b>5.72, d (12.8), 5.74, d (12.8)</b>             |
| 3''', 3''''              | 7.56 (d), 7.58 (d)                              | <b>7.56, d (15.6), 7.61, d (15.6)</b>             | 6.28, 6.34 | 167.3, 166.6                 | <b>7.59, d (16.0), 6.88, d (12.8)</b>             | <b>7.61, d (16.0), 6.94, d (12.8)</b>             | <b>6.89, d (12.8), 6.86, d (12.8)</b>             |
| 5''', 9''', 5'''', 9'''' | 7.33 (d), 7.42 (d)                              | 7.34, d (8.4), 7.43, d (8.4)                      | 6.72, 6.77 | 160.1, 160.3                 | 7.47, d (8.4), 7.71, d (8.4)                      | 7.36, d (8.8), 7.64, d (8.8)                      | 7.71, d (8.4), 7.62, d (8.4)                      |
| 6''', 8''', 6'''', 8'''' | 6.71 (d), 6.76 (d)                              | 6.72, d (7.8), 6.77, d (8.4)                      | 7.34, 7.43 | (125.9, 130.0), (125.8)      | 6.81, m, 6.81, m                                  | 6.63, d (8.8), 6.78, d (8.8)                      | 6.81, d (8.4), 6.69, d (8.4)                      |
